# Supplementary material for: Sulindac (K-80003) with nab-paclitaxel and gemcitabine overcomes drug-resistant pancreatic cancer
Source: PubMed Central journal article supplement — Mol Cancer. 2024 Sep 30;23:215. doi: 10.1186/s12943-024-02128-2 (PMC11441089; doi:10.1186/s12943-024-02128-2), 2024-09-30
Supplement: 12943_2024_2128_MOESM1_ESM.pdf [file 12943_2024_2128_MOESM1_ESM.pdf]

## **Supplementary Information (SI)**

### **Sulindac (K-80003) with Nab-Paclitaxel and Gemcitabine Overcomes Drug-resistant Pancreatic Cancer.**

#### **1. Supplemental Figures**

**Figure S1.** Biosafety of sulindac K-80003 in vivo.

**Figure S2.** cFAM124A has a central position in the PI3K/Akt signaling pathway.

**Figure S3.** Relative RNA expression of cFAM124A.

**Figure S4.** PDAC cells overexpressing cFAM124A leads to an increase in tRXR $\alpha$  protein.

**Figure S5.** cFAM124A acts as a scaffold for interaction between CTSL mRNA and IGF2BP2 to promote CTSL mRNA stability.

**Figure S6.** cFAM124A competes with CSTB through bait effect and enhances CTSL enzyme activity.

#### **2. Supplemental Tables**

**Table S1.** Baseline characteristics of 20 PDAC Patients.

**Table S2.** Baseline characteristics of PDAC samples.

**Table S3.** Baseline characteristics of cFAM124A in clinical PDAC samples.

**Fig. S1 Biosafety of sulindac K-80003 in vivo.**

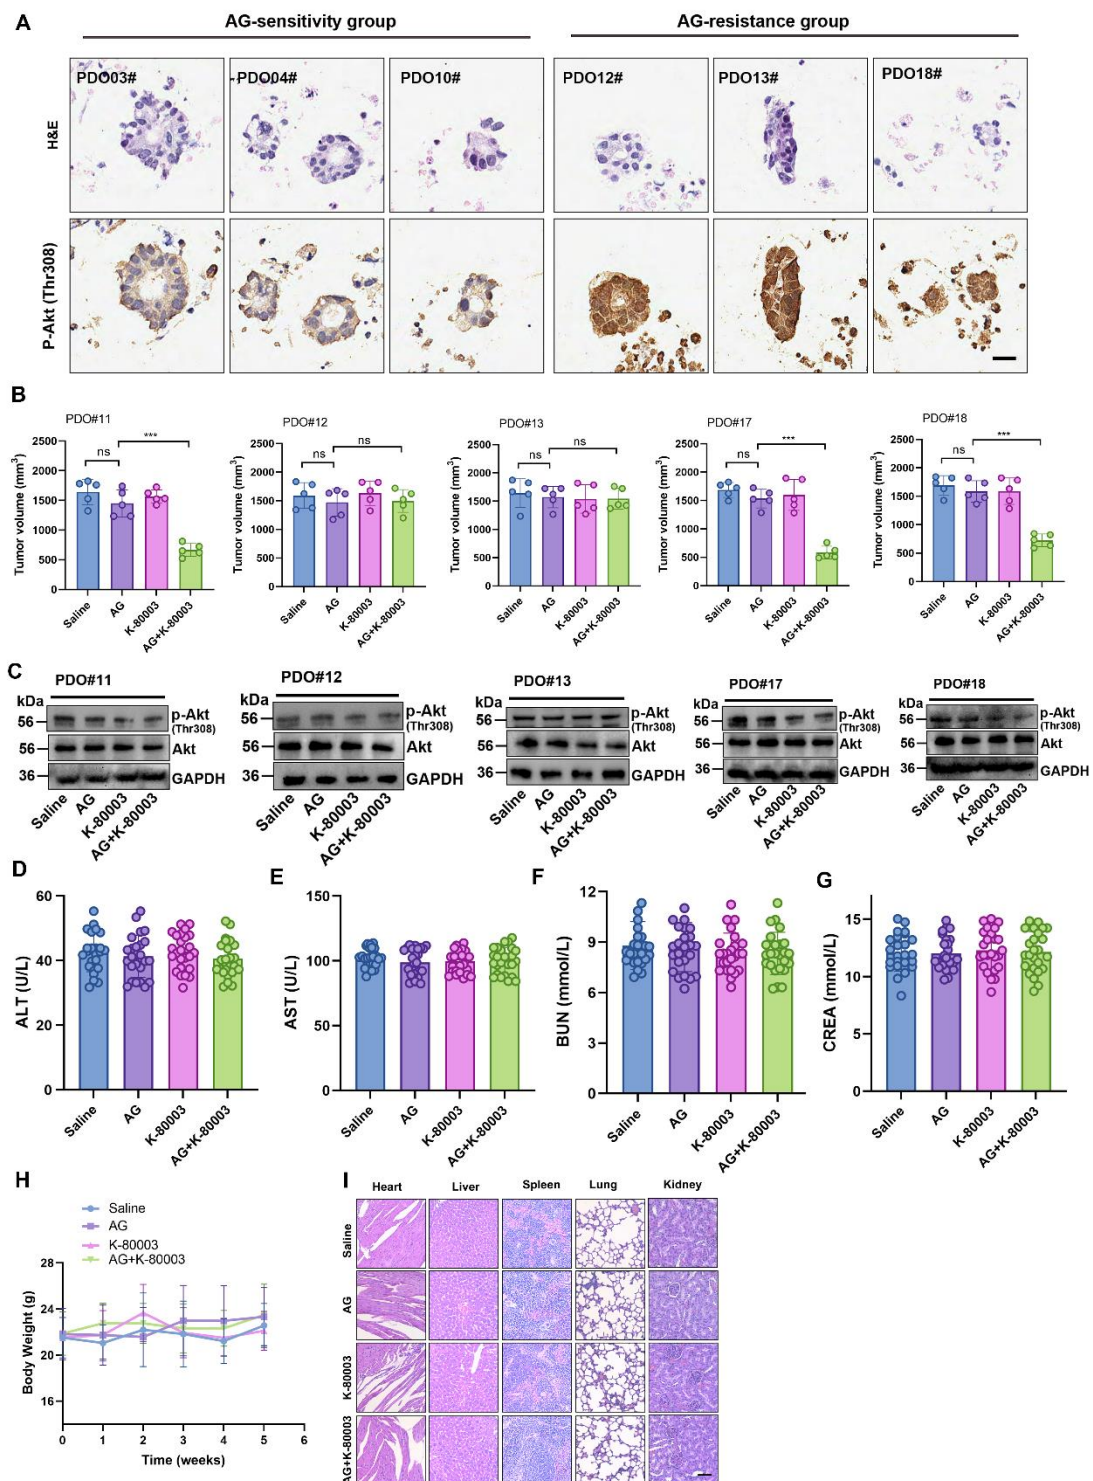

**A**, Representative images of H&E and IHC staining for p-Akt (Thr308) in PDOs from PDO-AGS and PDO-AGR groups. **B**, Tumors weight quantification from different groups of PDOXs received different treatments. **C**, Western blot analysis of Akt and p-

Akt (Thr308) in tumor tissue that derived from orthotopic PDOX mice model received different treatments. **D-G**, Kidney function (CREA and BUN levels) and liver function (AST and ALT levels) in subcutaneous tumor-bearing mice in the indicated groups (n=25). **H**, Body weights of subcutaneous tumor-bearing mice in the indicated groups (n=25). **I**, H&E staining of the main organs of subcutaneous tumor-bearing mice in the indicated groups. ns,  $P>0.05$ ; \*\* $P<0.01$ ; \*\*\* $P<0.001$ .

**Fig. S2 cFAM124A has a central position in the PI3K/Akt signaling pathway.**

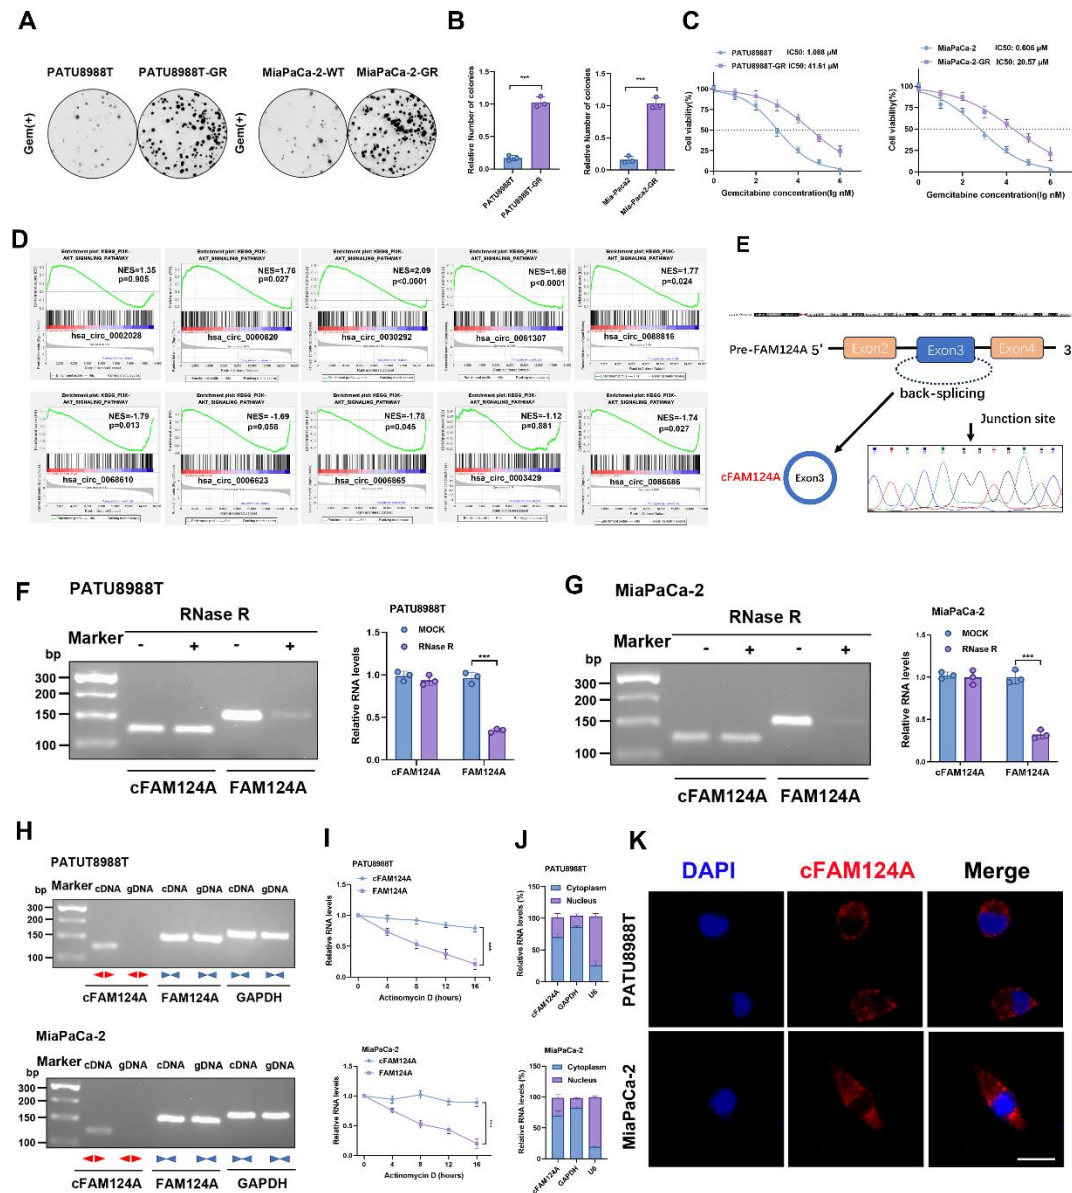

**A**, Colony formation assay for PATU8988T and PATU8988T-GR cells with GEM treatment in 6-well dishes (800 cells/well) for 2 weeks. Quantitative data are shown on the right. **B**, IC50 values for GEM in PATU8988T cells and PATU8988T-GR cells. **C**, Colony formation assay for MiaPaCa-2 and MiaPaCa-2-GR cells with GEM treatment in 6-well dishes (800 cells/well) for 2 weeks. Quantitative data are shown on the right. **D**, GSEA of 10 circRNAs demonstrating enrichment of DEGs in the PI3K/Akt pathway. **E**, Schematic of the genomic region of cFAM124A and its cyclization (top). The connection point of cFAM124A as identified by Sanger sequencing (bottom) **F-G**, Expression of cFAM124A and FAM124A mRNA expression after RNase R treatment by RT-qPCR and agarose gel electrophoresis. **H**, Agarose gel electrophoresis images showing amplification of cFAM124A and FAM124A mRNA in gDNA and cDNA from PATU8988T and MiaPaCa-2 cells. **I**, Relative expression levels of cFAM124A and FAM124A mRNA after actinomycin D treatment by RT-qPCR at the indicated time points. **J**, Detection of cFAM124A expression in cytoplasmic and nuclear fractions of RNAs extracted from PDAC cells. **K**, Subcellular localization of cFAM124A in PATU8988T and MiaPaCa-2 cells by FISH. Scale bar, 50  $\mu$ m. ns,  $P>0.05$ ; \*\* $P<0.01$ ; \*\*\* $P<0.001$ .

**Fig. S3**

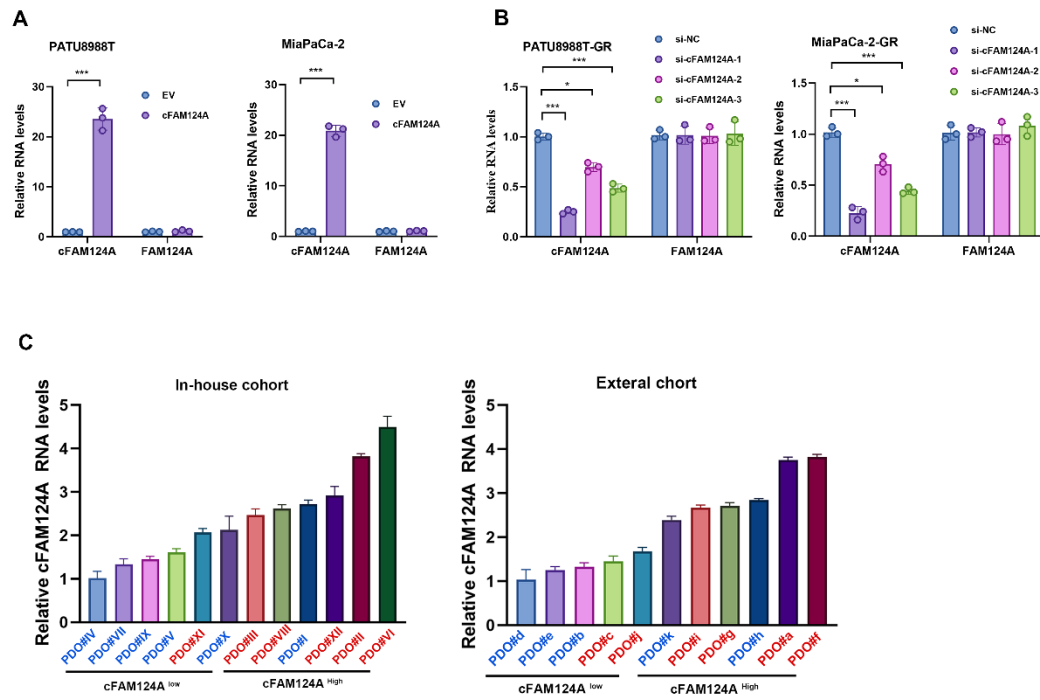

**A-B**, Relative RNA expression of cFAM124A and FAM124A in PDAC cells with cFAM124A overexpression or knockdown by qRT-PCR. **C**, cFAM124A expression in in both the In-house cohort and External cohort PDOs by RT-qPCR.  $P > 0.05$ ;  $**P < 0.01$ ;  $***P < 0.001$ . **C**, cFAM124A expression in In-house cohort and external cohort PDOs (Red: Response; Blue: Non-response)

**Fig. S4. PDAC cells overexpressing cFAM124A leads to an increase in tRXR $\alpha$  protein.**

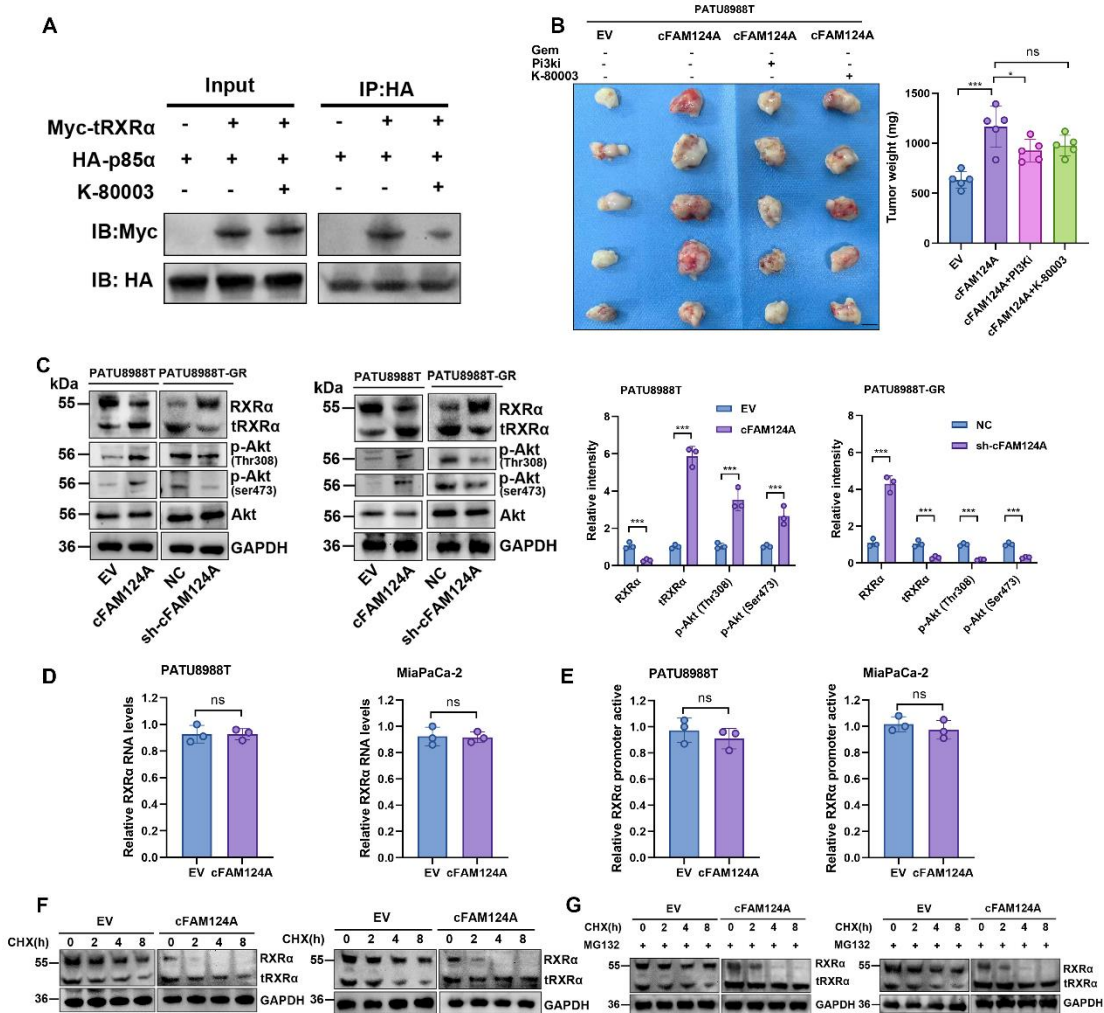

**A**, HA-p85 $\alpha$  was transfected with Myc-tagged tRXR $\alpha$  into HEK293T cells, and their interaction was analyzed by coIP using anti-HA antibody. **B**, Subcutaneous xenograft model of mice in the different groups. Copanlisib (1 mg/kg, iv. 2 $\times$ /week for 4 weeks), or K-80003 (20 mg/ kg i.p. 2 $\times$ /week for 4 weeks) at 2 weeks after subcutaneous injection of 5 $\times$ 10<sup>6</sup> cells overexpressing cFAM124A and control cells. Representative images of tumors are shown (n=5). **C**, Western blot analysis of RXR $\alpha$ , Akt, p-Akt (Ser473), and p-Akt (Thr308) expression in PDAC cells overexpressing cFAM124A or with cFAM124A knockout and control cells. **D**, Relative RNA expression of RXR $\alpha$  in PDAC cells overexpressing cFAM124A by RT-qPCR. **E**, Promoter activity of RXR $\alpha$  genes in PDAC cells overexpressing cFAM124A. **F**, cFAM124A increased RXR $\alpha$  protein degradation: Indicated PDAC cell lines were incubated with CHX for indicated time periods before western blot analysis of RXR $\alpha$  and GAPDH expression. Representative images are shown. **G**, Indicated PDAC cell lines were incubated with MG132 and then with CHX for indicated time periods before western blot analysis of RXR $\alpha$  and GAPDH expression. Representative images are shown.

**A**

**B**

**C**

**D**

**E**

**F**

**G**

**H**

**I**

**J**

**K**

**L**

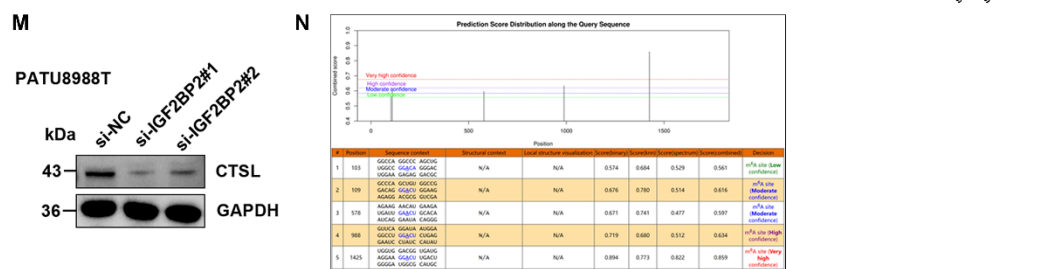

**A**, Western blot analysis of RXR $\alpha$  expression after 24 h of treatment with PD150606 (200 nM, m-calpain inhibitor) or ZFY-CHO (10  $\mu$ M, CTSL inhibitor). Representative images are shown. **B**, Indicated PDAC cell lines were incubated with ZFY-CHO and then with CHX for indicated time periods before western blot analysis of RXR $\alpha$  and GAPDH expression. Representative images are shown. **C**, Relative RNA expression of CTSL in PDAC cells with cFAM124A overexpression or knockdown by RT-qPCR. CTSL protein expression in PDAC cells with cFAM124A overexpression or knockdown by western blotting. **D**, CTSL level by ELISA in PDAC cells with cFAM124A overexpression or knockdown. **E**, AGO2 pulldown by the LacZ probe (control) or cFAM124A probe. **F**, Coding potential of cFAM124A predicted based on the circRNADb database. **G**, Subcellular localization of IGF2BP2 (green) and cFAM124A (red) detected by FISH. Scale bar, 50  $\mu$ m. **H**, IGF2BP2 protein expression in PATU8988T with cFAM124A overexpression by western blotting. **I**, CTSL mRNA enrichment by IGF2BP2 on RIP assay in the indicated groups. **J**, Sequences of wild-type cFAM124A and mutated cFAM124A. **K**, Protein expression of IGF2BP2 in PATU8988T cells with IGF2BP2 knockdown. **L-M**, mRNA (L) and protein (M) expression of CTSL in PATU8988T cells with IGF2BP2 knockdown. **N**, Prediction of m6A methylation of CTSL mRNA at one site based on SRAMP software analysis. ns,  $P>0.05$ ; \*\* $P<0.01$ ; \*\*\* $P<0.001$ .

**Fig. S6 cFAM124A competes with CSTB through bait effect and enhances CTSL enzyme activity.**

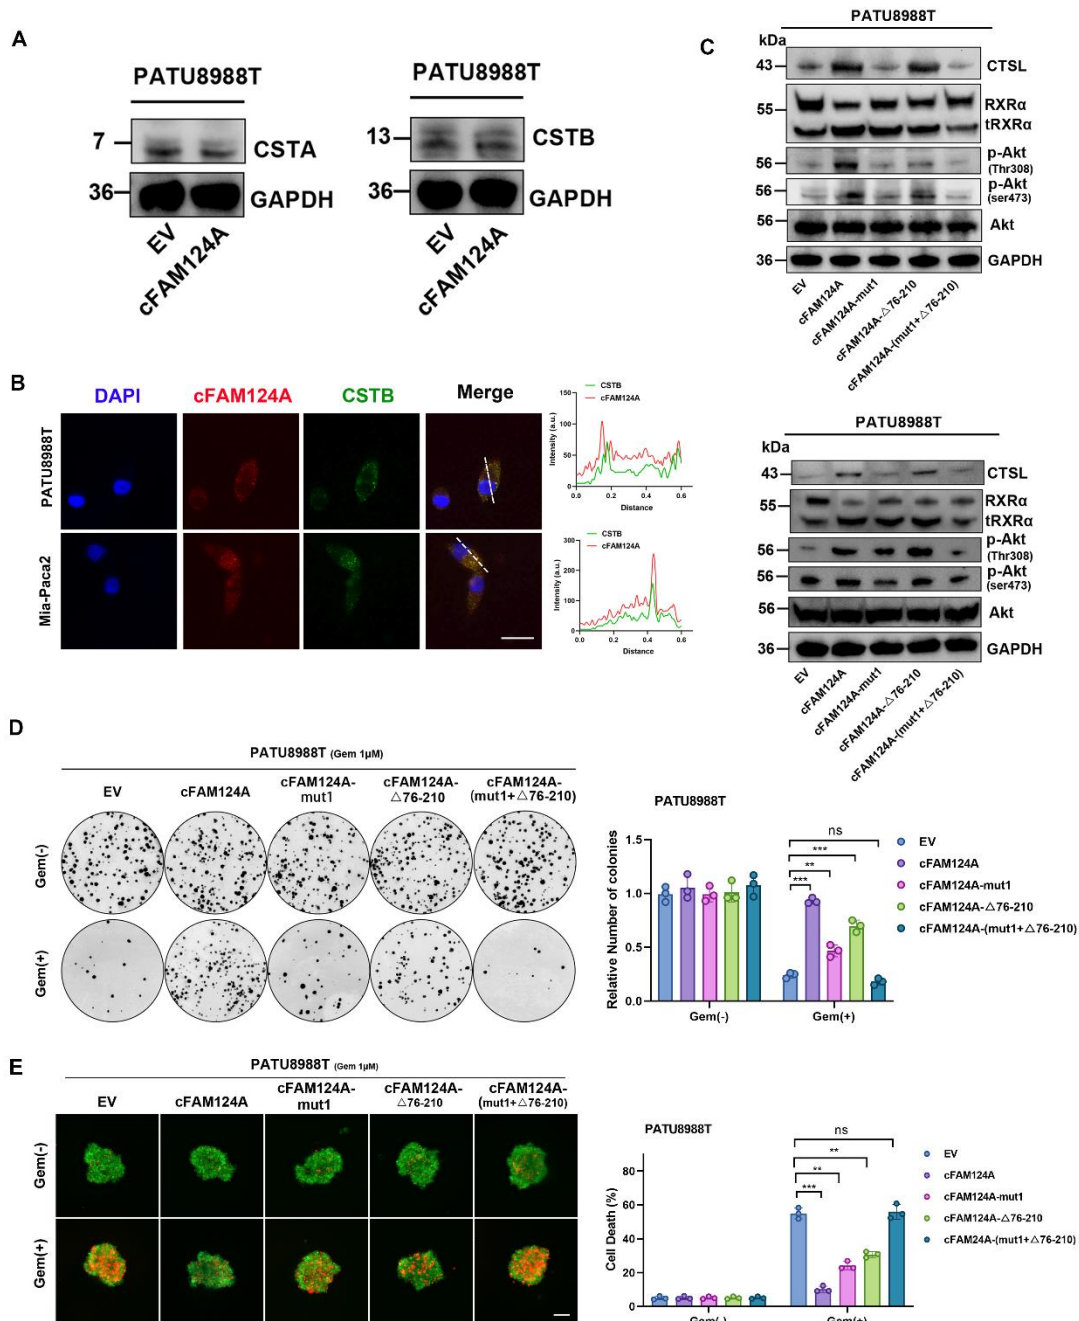

**A**, CSTA and CSTB expression in PATU8988T cells overexpressing cFAM124A by western blotting. **B**, Subcellular localization of CSTB (green) and cFAM124A (red) detected by FISH. Scale bar, 50  $\mu$ m. **C**, Western blot analysis of CTSL, RXR $\alpha$ , Akt, p-Akt (Ser473), and p-Akt (Thr308) protein expression in the indicated groups. **D**, Colony formation assay in the indicated groups with GEM treatment in 6-well dishes (800 cells/well) for 2 weeks. **E**, Necrosis in 3D tumor spheroids based on PI staining (red) and its quantification in the indicated groups after treatment with GEM. Scale bar, 100  $\mu$ m. Quantitative data are shown on the right. ns,  $P>0.05$ ; \*\* $P<0.01$ ; \*\*\* $P<0.001$ .

Table S1. Baseline characteristics of 20 PDAC Patients.

|               |       |           |                 | Pre-treatment                  |                  |              |                     | Post-treatment                        |                                  |              |                     |                      |           |
|---------------|-------|-----------|-----------------|--------------------------------|------------------|--------------|---------------------|---------------------------------------|----------------------------------|--------------|---------------------|----------------------|-----------|
| PDAC Patients | Group | Location  | Differentiation | Vascular invasion (PV/SMV/SMA) | Liver metastasis | CA199 (U/ml) | Tumor diameter (cm) | Pre-existing liver metastasis changes | Newly developed liver metastasis | CA199 (U/ml) | Tumor diameter (cm) | Progression of tumor | RECIST1.1 |
| P01           | AG-S  | Body/tail | poor            | SMA                            | No               | 324          | 3.7*3.2             | No                                    | no                               | 29           | 2.3*2.1             | no                   | PR        |
| P02           | AG-S  | Head      | well/moderate   | No                             | Single           | 68           | 3.2*2.3             | Shrinkage                             | no                               | 57           | 2.1*2.0             | no                   | PR        |
| P03           | AG-S  | Body/tail | poor            | SMA                            | Single           | 433          | 3.2*2.9             | Shrinkage                             | no                               | 327          | 2.4*1.9             | no                   | PR        |
| P04           | AG-S  | Body/tail | poor            | No                             | Single           | 341          | 3.7*3.3             | Shrinkage                             | no                               | 322          | 2.2*1.7             | no                   | PR        |
| P05           | AG-S  | Head      | well/moderate   | PV                             | No               | 32           | 2.5*2.4             | No                                    | no                               | 34           | 1.3*1.1             | no                   | PR        |
| P06           | AG-S  | Body/tail | poor            | NO                             | Multiple         | 567          | 4.2*3.4             | Shrinkage                             | no                               | 325          | 2.7*2.1             | no                   | PR        |
| P07           | AG-S  | Head      | well/moderate   | SMV                            | No               | 35           | 3.6*2.7             | No                                    | no                               | 34           | 2.5*1.8             | no                   | PR        |
| P08           | AG-S  | Head      | well/moderate   | SMV                            | Multiple         | 165          | 4.1*3.2             | Shrinkage                             | no                               | 67           | 3.2*2.2             | no                   | PR        |
| P09           | AG-S  | Body/tail | well/moderate   | No                             | Single           | 131          | 2.8*2.6             | No                                    | no                               | 35           | 2.2*1.5             | no                   | PR        |
| P10           | AG-S  | Body/tail | poor            | No                             | Single           | 133          | 3.4*2.9             | Shrinkage                             | no                               | 65           | 2.8*2.1             | no                   | PR        |
| P11           | AG-R  | Head      | well/moderate   | SMV                            | Multiple         | 232          | 3.3*3.1             | Increase                              | no                               | 423          | 3.6*3.2             | yes                  | PD        |
| P12           | AG-R  | Body/tail | poor            | No                             | Single           | 272          | 3.6*3.2             | No                                    | yes                              | 341          | 3.6*3.5             | yes                  | PD        |
| P13           | AG-R  | Head      | poor            | SMV                            | No               | 34           | 2.7*2.5             | No                                    | no                               | 274          | 4.2*3.1             | yes                  | PD        |
| P14           | AG-R  | Head      | poor            | PV                             | No               | 242          | 3.8*2.7             | No                                    | yes                              | 323          | 3.2*2.1             | yes                  | PD        |
| P15           | AG-R  | Body/tail | well/moderate   | No                             | Single           | 30           | 3.7*2.4             | Increase                              | no                               | 332          | 3.7*2.9             | yes                  | PD        |
| P16           | AG-R  | Body/tail | poor            | No                             | Single           | 32           | 2.8*2.5             | Increase                              | no                               | 127          | 3.1*2.7             | yes                  | PD        |
| P17           | AG-R  | Head      | poor            | PV                             | NO               | 673          | 3.2*2.1             | Increase                              | no                               | 931          | 4.0*3.7             | yes                  | PD        |
| P18           | AG-R  | Head      | poor            | SMV                            | Multiple         | 433          | 3.7*3.4             | No                                    | yes                              | 523          | 3.4*3.4             | yes                  | PD        |
| P19           | AG-R  | Body/tail | poor            | No                             | Multiple         | 321          | 3.4*3.1             | No                                    | yes                              | 453          | 4.1*3.2             | yes                  | PD        |
| P20           | AG-R  | Body/tail | well/moderate   | SMA                            | Single           | 432          | 4.3*3.5             | Increase                              | no                               | 464          | 4.2*3.9             | yes                  | PD        |

AG-sensitive, AG-S; AG-resistant, AG-R; PV, portal vein; SMV, superior mesenteric vein; SMA, superior mesenteric artery.

**Table S2.** Baseline characteristics of PDAC samples.

| Characteristics       | In-house cohort(n=12) |              |          | External cohort(n=11) |              |          | <i>p</i><br>(In house vs. External) |
|-----------------------|-----------------------|--------------|----------|-----------------------|--------------|----------|-------------------------------------|
|                       | Response              | Non-Response | total    | Response              | Non-Response | total    |                                     |
| Age                   |                       |              |          |                       |              |          | 0.667                               |
| <60                   | 1(16.7)               | 2(33.3)      | 3(25.0)  | 1(20.0)               | 3(33.3)      | 4(36.4)  |                                     |
| ≥60                   | 5(83.3)               | 4(66.7)      | 9(75.0)  | 4(80.0)               | 3(66.7)      | 7(63.6)  |                                     |
| Sex                   |                       |              |          |                       |              |          | 1.000                               |
| female                | 1(16.7)               | 2(33.3)      | 3(25.0)  | 1(20.0)               | 2(33.3)      | 3(27.3)  |                                     |
| male                  | 5(83.3)               | 4(66.7)      | 9(75.0)  | 4(80.0)               | 4(66.7)      | 8(72.7)  |                                     |
| Tumor location        |                       |              |          |                       |              |          | 0.684                               |
| Body/tail             | 4(66.7)               | 3(50.0)      | 7(58.3)  | 1(20.0)               | 4(66.7)      | 5(45.6)  |                                     |
| Head                  | 2(33.3)               | 3(50.0)      | 5(41.7)  | 4(80.0)               | 2(33.3)      | 6(54.4)  |                                     |
| Lymph node metastasis |                       |              |          |                       |              |          | 1.000                               |
| no                    | 1(16.7)               | 1(16.7)      | 2(16.7)  | 1(20.0)               | 0            | 1(9.1)   |                                     |
| yes                   | 5(83.3)               | 5(83.3)      | 10(83.3) | 4(80.0)               | 6(100)       | 10(90.9) |                                     |
| CA199                 |                       |              |          |                       |              |          | 1.000                               |
| <37                   | 1(16.7)               | 2(33.3)      | 3(25.0)  | 1(20.0)               | 1(16.7)      | 2(18.2)  |                                     |
| ≥37                   | 5(83.3)               | 4(66.7)      | 9(75.0)  | 4(80.0)               | 5(83.3)      | 9(81.8)  |                                     |
| Differentiation       |                       |              |          |                       |              |          | 1.000                               |
| poor                  | 4(66.7)               | 4(60.0)      | 8(66.7)  | 3(60.0)               | 4(66.7)      | 7(63.6)  |                                     |
| well/moderate         | 2(33.3)               | 2(40.0)      | 4(33.3)  | 2(40.0)               | 2(33.3)      | 4(36.4)  |                                     |
| Tumor size            |                       |              |          |                       |              |          | 1.000                               |
| ≤4cm                  | 2(33.3)               | 2(33.3)      | 4(33.3)  | 2(40.0)               | 2(33.3)      | 4(36.4)  |                                     |
| > 4cm                 | 4(66.7)               | 4(66.7)      | 8(66.7)  | 3(60.0)               | 4(66.7)      | 7(63.6)  |                                     |
| AJCC stage            |                       |              |          |                       |              |          | 1.000                               |
| II                    | 2(33.7)               | 3(50.0)      | 5(41.7)  | 2(40.0)               | 2(33.3)      | 4(36.4)  |                                     |
| III                   | 4(66.7)               | 3(50.0)      | 7(58.3)  | 3(60.0)               | 4(66.7)      | 7(63.6)  |                                     |

Pancreatic ductal adenocarcinoma; PDAC; *p*, Two-sided Fisher's exact test

**Table S3.** Baseline characteristics of cFAM124A in clinical PDAC samples.

| Characteristics       | Low expression<br>cFAM124A<br>n=66 | High expression<br>cFAM124A<br>n=66 | <i>p</i> |
|-----------------------|------------------------------------|-------------------------------------|----------|
| Age                   |                                    |                                     | 0.596    |
| <60                   | 26(39.4)                           | 29(43.9)                            |          |
| ≥60                   | 40(60.6)                           | 37(56.1)                            |          |
| Sex                   |                                    |                                     | 0.856    |
| female                | 23(34.8)                           | 24(36.4)                            |          |
| male                  | 43(65.2)                           | 42(63.6)                            |          |
| Tumor location        |                                    |                                     | 1.000    |
| Body/tail             | 38(57.6)                           | 38(57.6)                            |          |
| Head                  | 28(42.4)                           | 28(42.4)                            |          |
| Lymph node metastasis |                                    |                                     | 0.159    |
| no                    | 32(48.5)                           | 24(36.4)                            |          |
| yes                   | 34(51.5)                           | 42(63.6)                            |          |
| CA199                 |                                    |                                     | 0.024    |
| <37                   | 21(31.8)                           | 10(15.2)                            |          |
| ≥37                   | 45(68.2)                           | 56(84.8)                            |          |
| Differentiation       |                                    |                                     | 0.002    |
| poor                  | 25(37.9)                           | 43(65.2)                            |          |
| well/moderate         | 41(62.1)                           | 23(34.8)                            |          |
| AJCC stage            |                                    |                                     | 0.798    |
| I                     | 5(7.6)                             | 3(4.5)                              |          |
| II                    | 12(18.2)                           | 13(19.7)                            |          |
| III                   | 27(40.9)                           | 24(36.4)                            |          |
| IV                    | 22(33.3)                           | 26(39.4)                            |          |
| PFS                   |                                    |                                     | 0.008    |
| <12 (Gem-R)           | 21(31.8)                           | 36(54.5)                            |          |
| ≥12 (Gem-S)           | 45(68.2)                           | 30(45.5)                            |          |

cFAM124A, Pancreatic ductal adenocarcinoma PDAC; *p*, Two-sided Pearson's  $\chi^2$  test
