# Supplementary material for: Sulindac (K-80003) with nab-paclitaxel and gemcitabine overcomes drug-resistant pancreatic cancer
Source: PubMed Central journal article supplement — Mol Cancer. 2024 Sep 30;23:215. doi: 10.1186/s12943-024-02128-2 (PMC11441089; doi:10.1186/s12943-024-02128-2), 2024-09-30
Supplement: 12943_2024_2128_MOESM2_ESM.pdf [file 12943_2024_2128_MOESM2_ESM.pdf]

### Full unedited gel for Figure 6A

#### Full unedited gel for Figure 6A-GAPDH

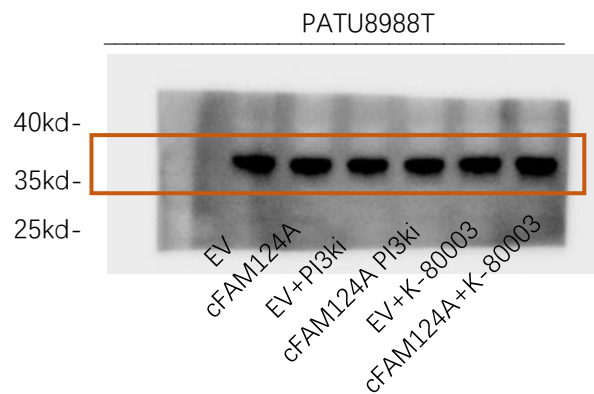

#### Full unedited gel for Figure 6A-AKT

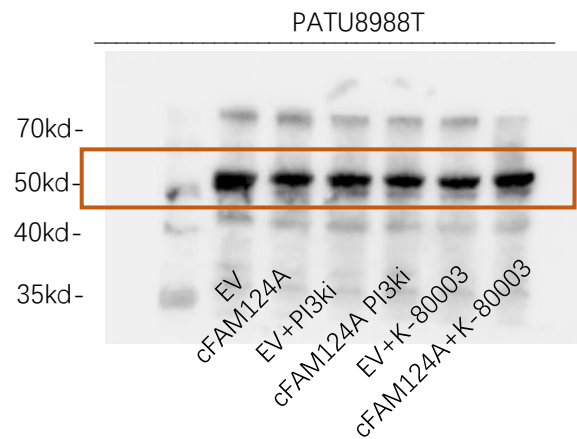

#### Full unedited gel for Figure 6A-p-Akt(ser473)

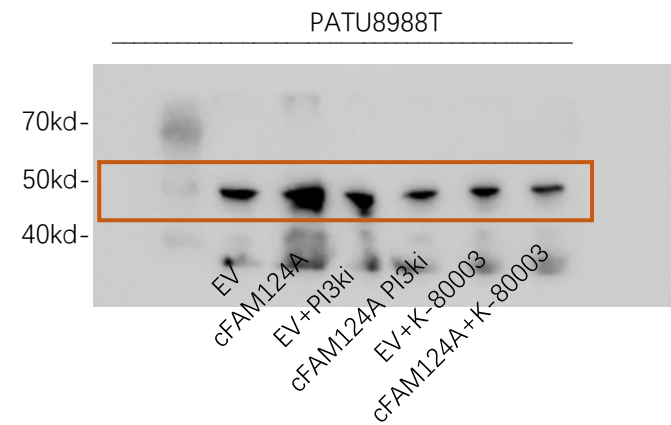

#### Full unedited gel for Figure 6A-p-Akt(Thr308)

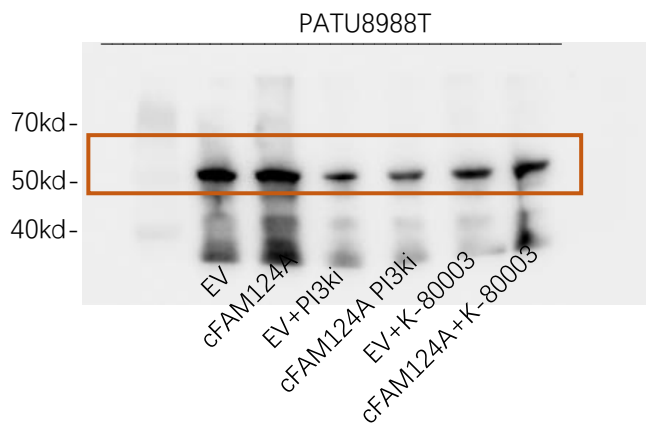

#### Full unedited gel for Figure 6A-Cleaved-caspase3

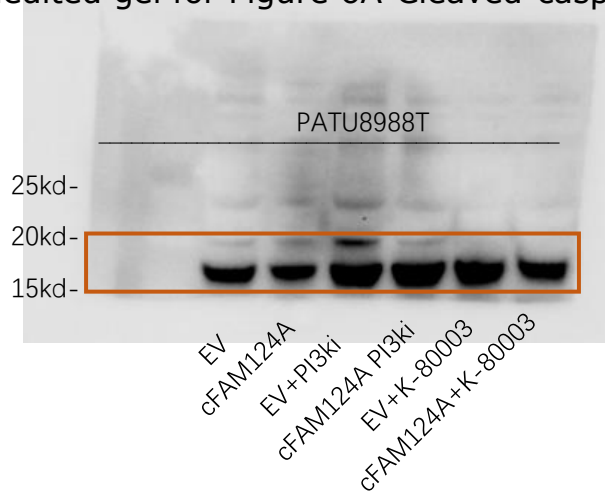

#### Full unedited gel for Figure 6A-Cleaved-caspase8

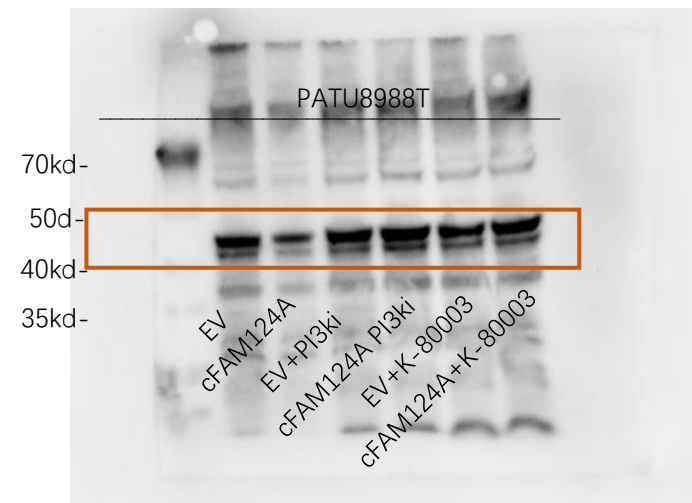

Full unedited gel for Figure 6A-GAPDH

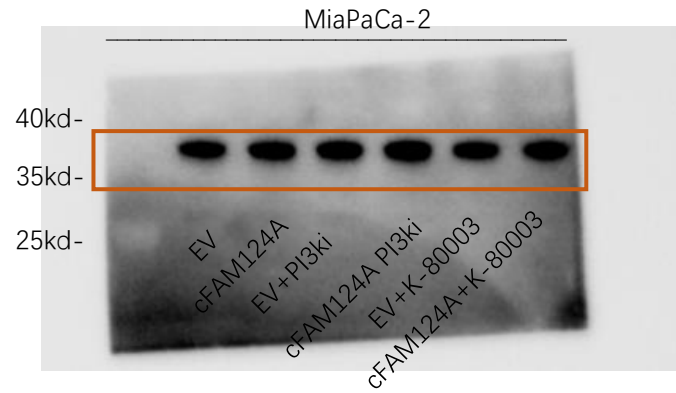

Full unedited gel for Figure 6A

Full unedited gel for Figure 6A-AKT

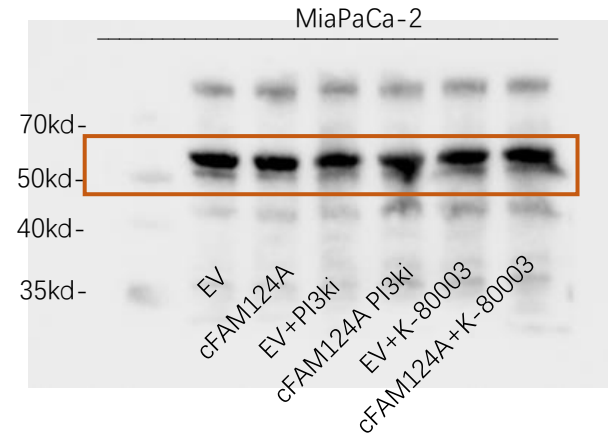

Full unedited gel for Figure 6A-p-Akt(ser473)

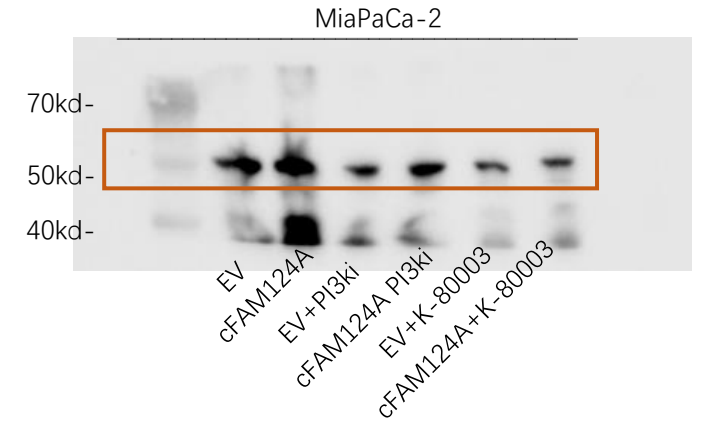

Full unedited gel for Figure 6A-p-Akt(Thr308)

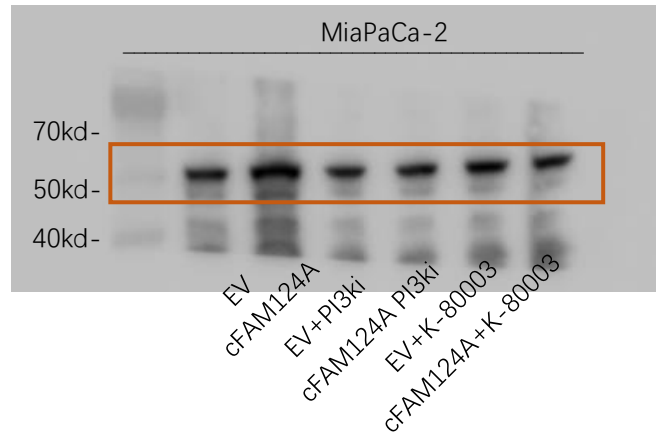

Full unedited gel for Figure 6A-Cleaved-caspase3

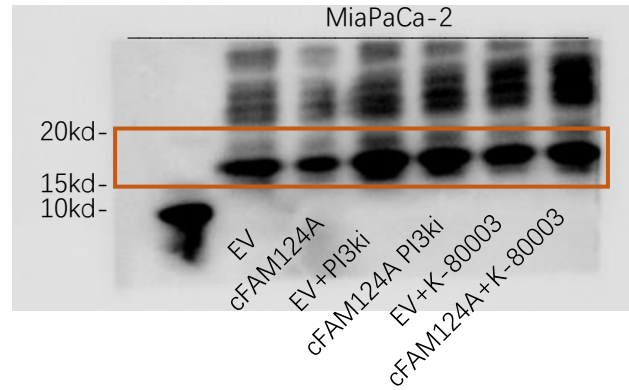

Full unedited gel for Figure 6A-Cleaved-caspase8

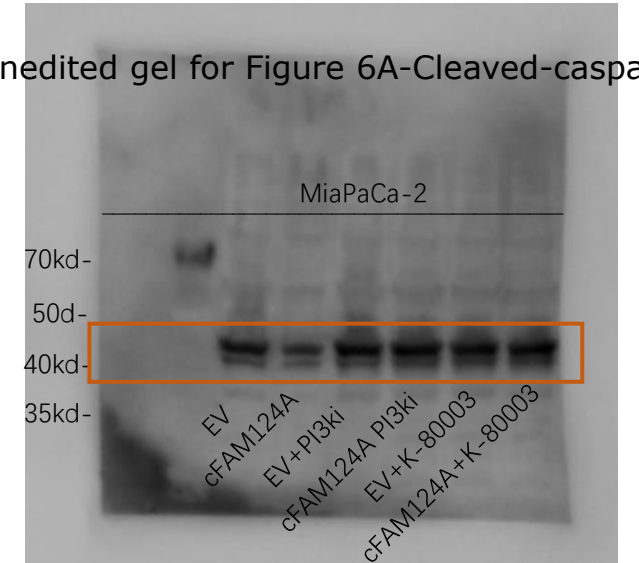

**Full unedited gel for Figure 6H**

Full unedited gel for Figure 6H GAPDH

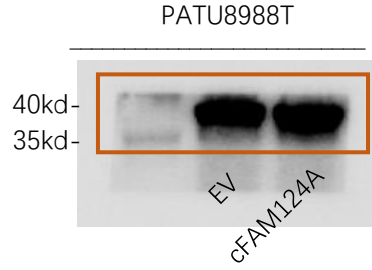

Full unedited gel for Figure 6H-AKT

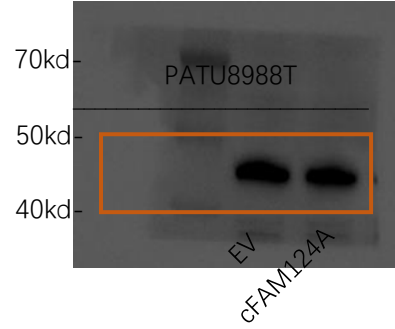

Full unedited gel for Figure 6H p-Akt(Thr308)

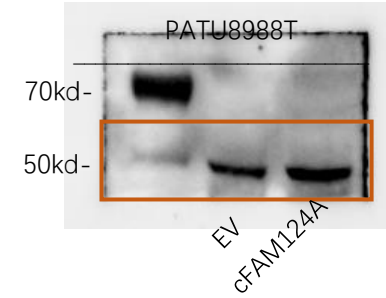

Full unedited gel for Figure 6H p-Akt(ser473)

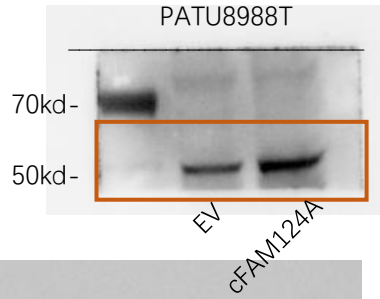

Full unedited gel for Figure 6H RXR $\alpha$ ,tRXR $\alpha$

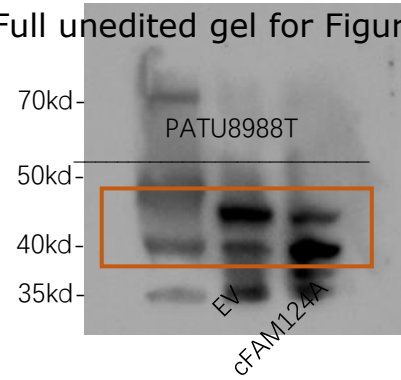

Full unedited gel for Figure 6H GAPDH

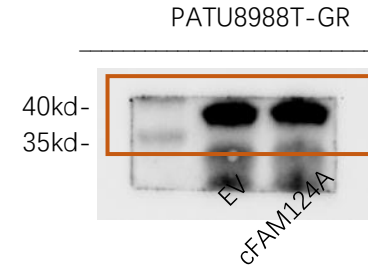

Full unedited gel for Figure 6H RXR $\alpha$ ,tRXR $\alpha$

Full unedited gel for Figure 6H p-Akt(Thr308)

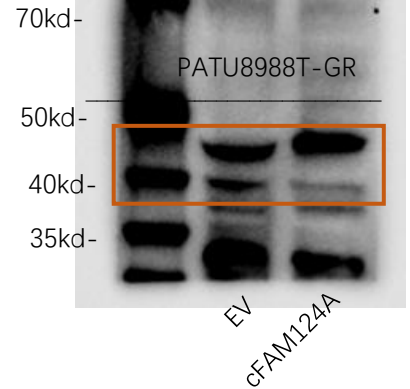

Full unedited gel for Figure 6H p-Akt(ser473)

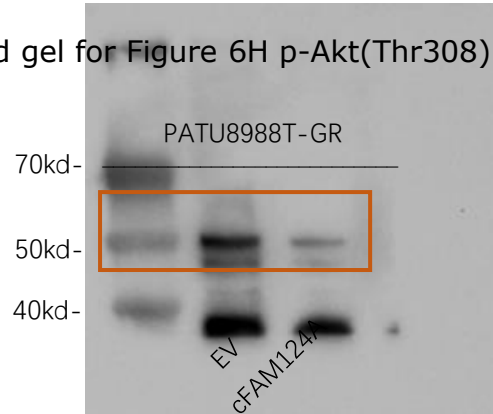

Full unedited gel for Figure 6H Akt

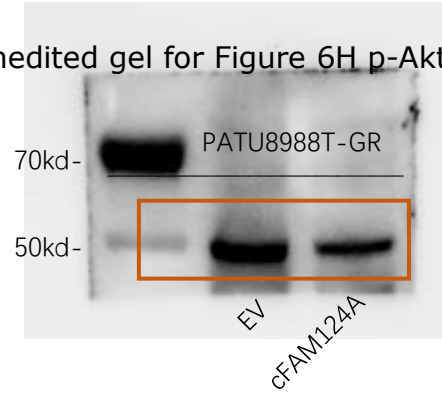

Full unedited gel for Figure 6H Akt

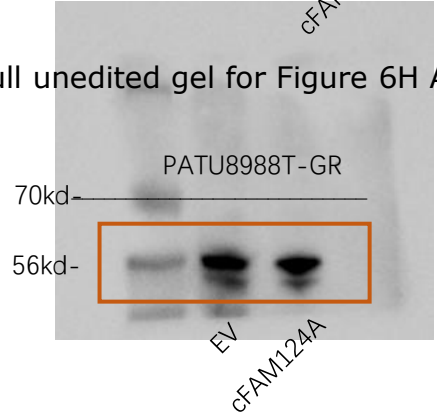

**Full unedited gel for Figure 6I**

Full unedited gel for Figure 6I GAPDH

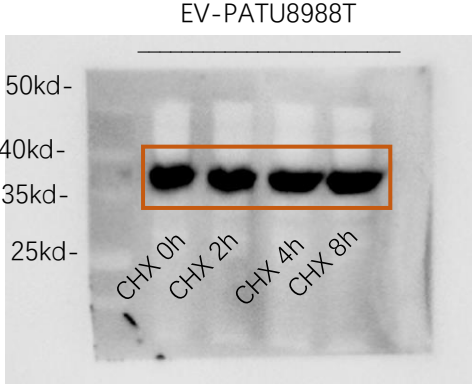

Full unedited gel for Figure 6I GAPDH

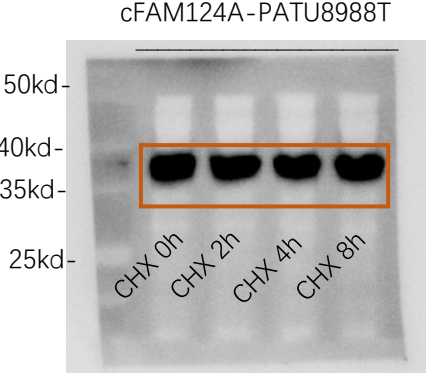

Full unedited gel for Figure 6I RXR $\alpha$ ,tRXR $\alpha$

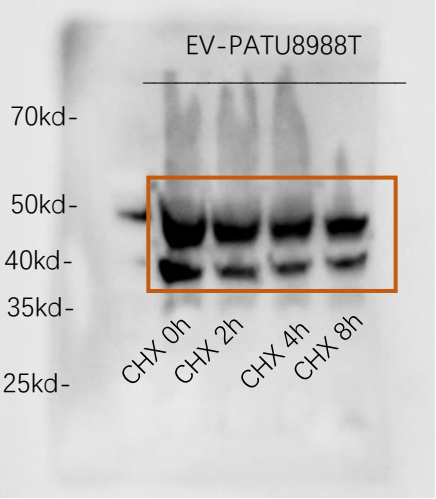

Full unedited gel for Figure 6I RXR $\alpha$ ,tRXR $\alpha$

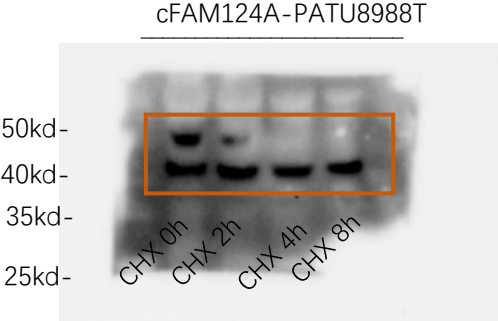

**Full unedited gel for Figure 6J**

Full unedited gel for Figure 6J GAPDH

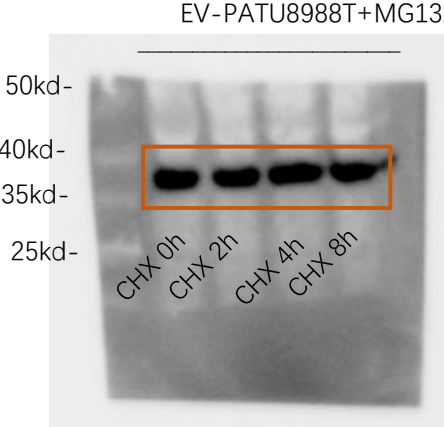

Full unedited gel for Figure 6J GAPDH

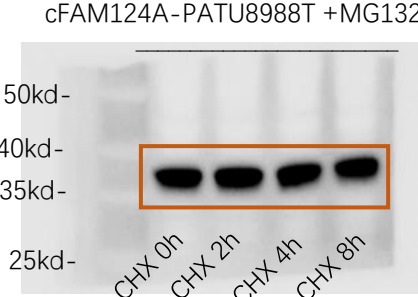

Full unedited gel for Figure 6J RXR $\alpha$ ,tRXR $\alpha$

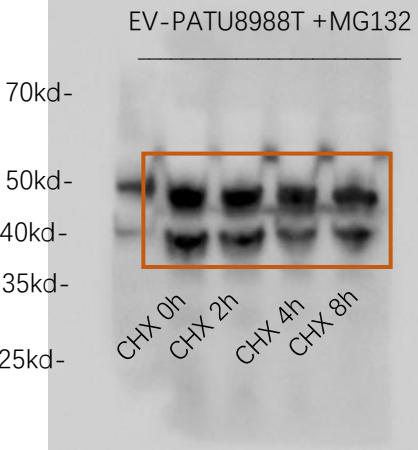

Full unedited gel for Figure 6J RXR $\alpha$ ,tRXR $\alpha$

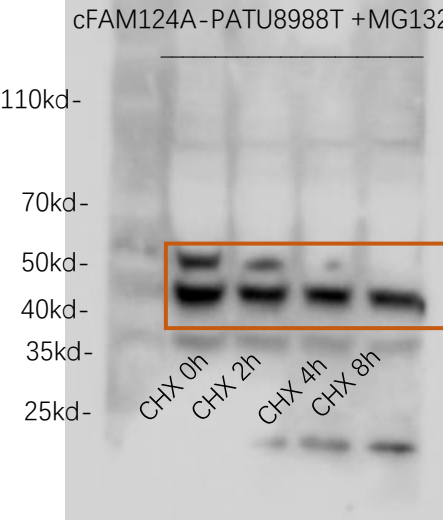

Full unedited gel for Figure 7A

Full unedited gel for Figure 7A GAPDH

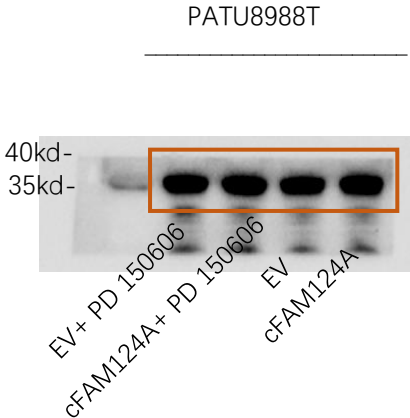

Full unedited gel for Figure 7A RXR $\alpha$ ,tRXR $\alpha$

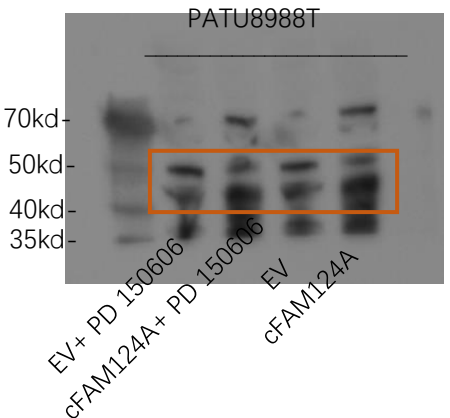

Full unedited gel for Figure 7A GAPDH

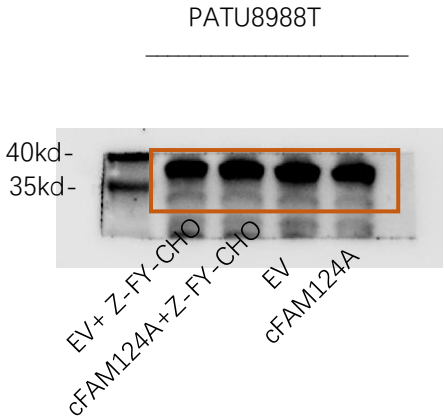

Full unedited gel for Figure 7A RXR $\alpha$ ,tRXR $\alpha$

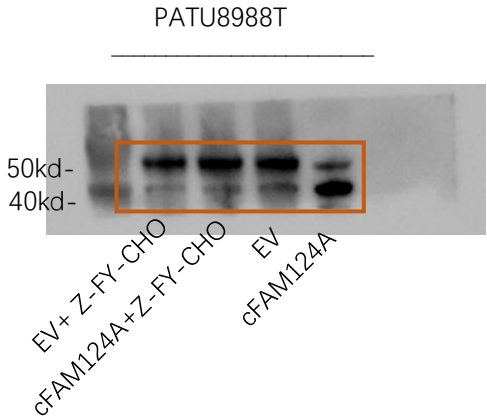

**Full unedited gel for Figure 7B**

Full unedited gel for Figure 7B GAPDH

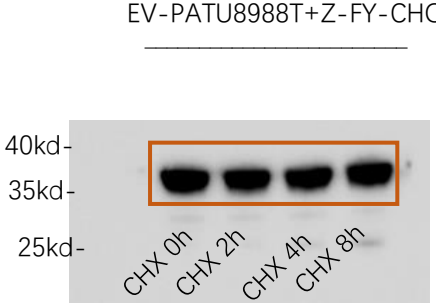

Full unedited gel for Figure 7B GAPDH

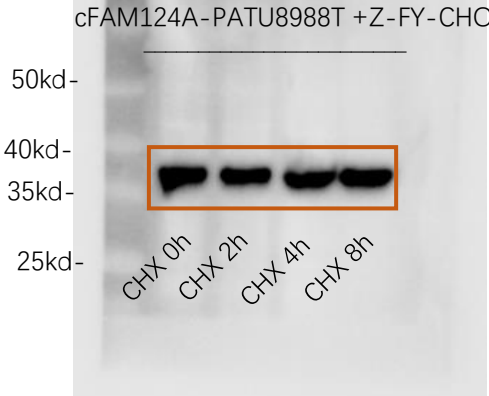

Full unedited gel for Figure 7B RXRa,tRXRa

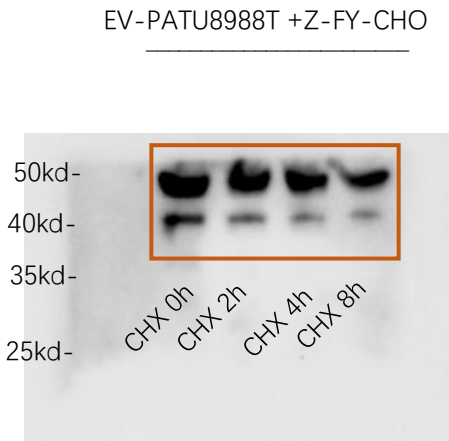

Full unedited gel for Figure 7B RXRa,tRXRa

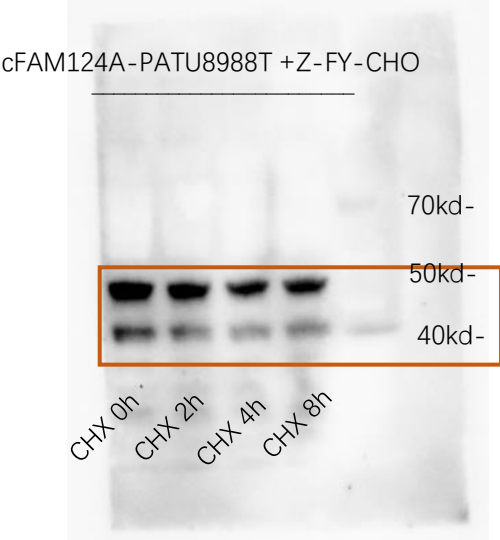

### Full unedited gel for Figure 7F

Full unedited gel for Figure 7F IGF2BP2

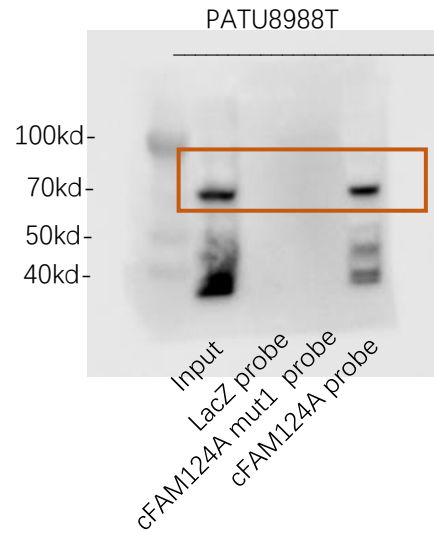

### Full unedited gel for Figure 7G

Full unedited gel for Figure 7G IGF2BP2

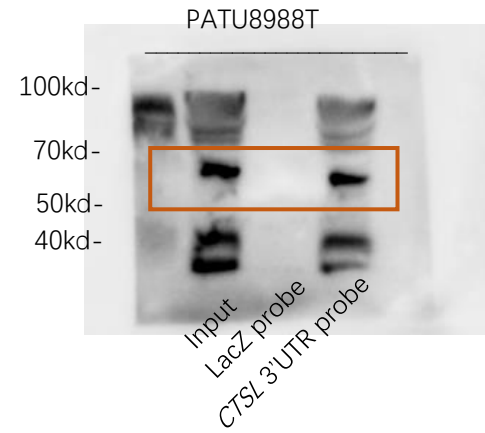



### Full unedited gel for Figure 7I

Full unedited gel for Figure 7I IGF2BP2

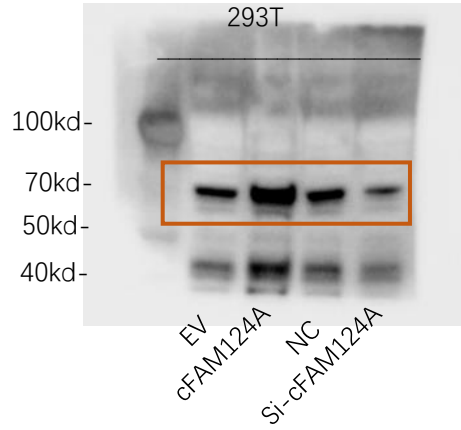

Full unedited gel for Figure 7I IGF2BP2

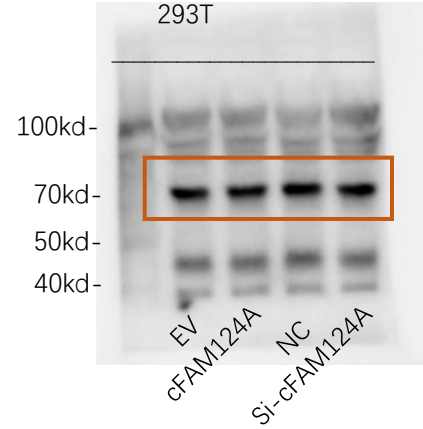

Full unedited gel for Figure 7I IGF2BP2

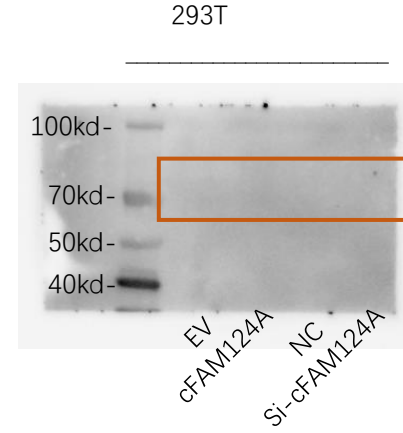

### Full unedited gel for Figure 7J

Full unedited gel for Figure 7J IGF2BP2

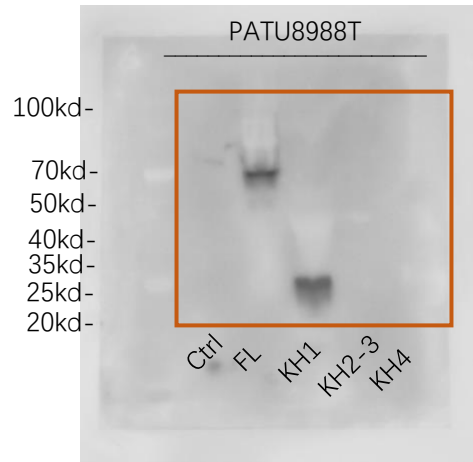

Full unedited gel for Figure 7J IGF2BP2

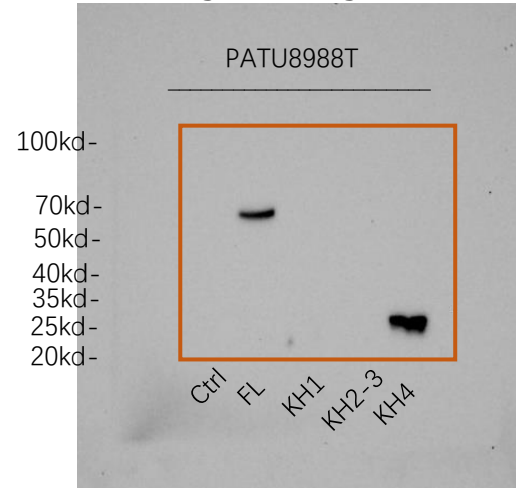

Full unedited gel for Figure 7J IGF2BP2

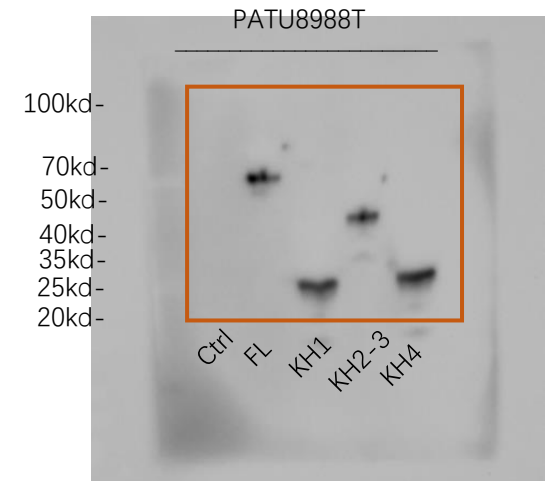

Full unedited gel for Figure 7M

Full unedited gel for Figure 7M Akt

Full unedited gel for Figure 7M CTSL

Full unedited gel for Figure 7M p-Akt(Thr308)

Full unedited gel for Figure 7M RXR $\alpha$ ,tRXR $\alpha$

Full unedited gel for Figure 7M GAPDH

Full unedited gel for Figure 7M p-Akt(ser473)

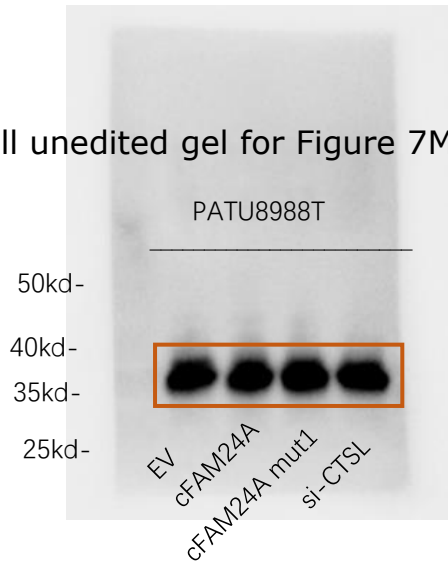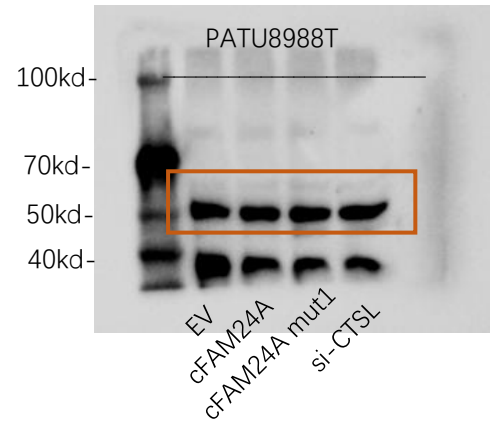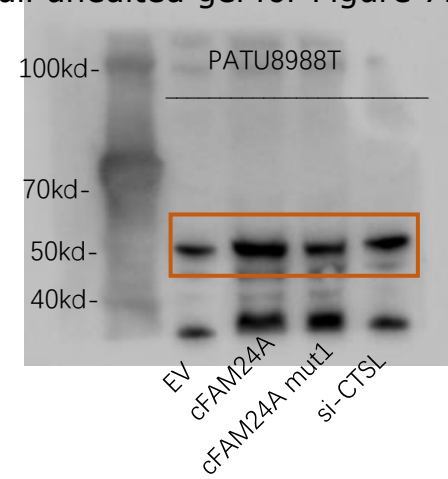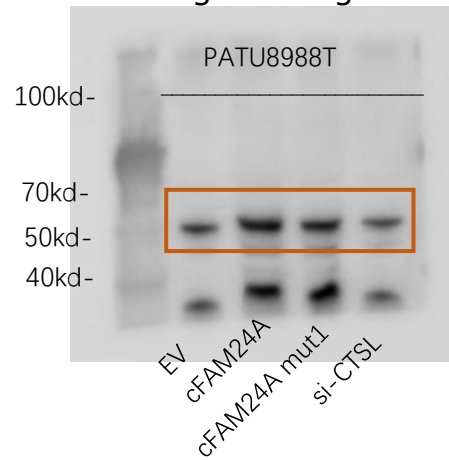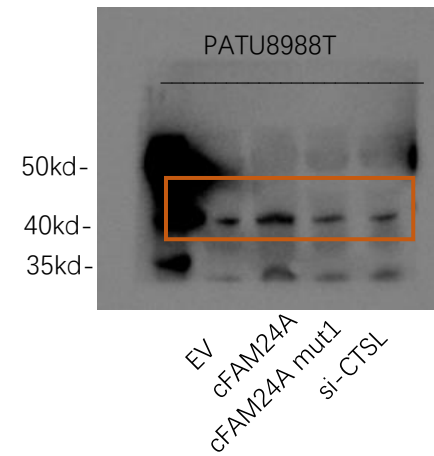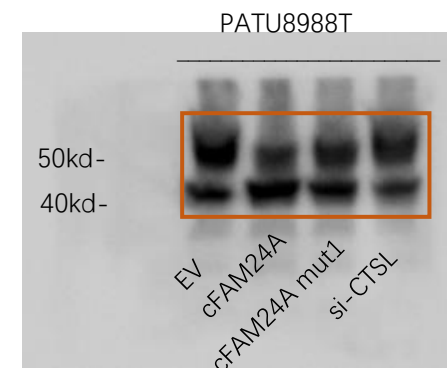

## Full unedited gel for Figure 8B

Full unedited gel for Figure 8B CSTB

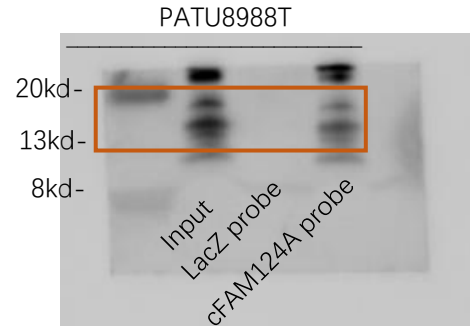

## Full unedited gel for Figure 8D

Full unedited gel for Figure 8D CTSL

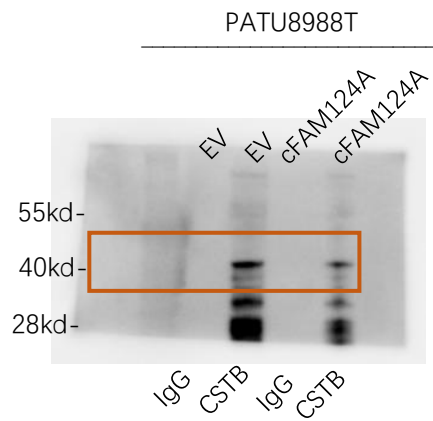

Full unedited gel for Figure 8D CSTB

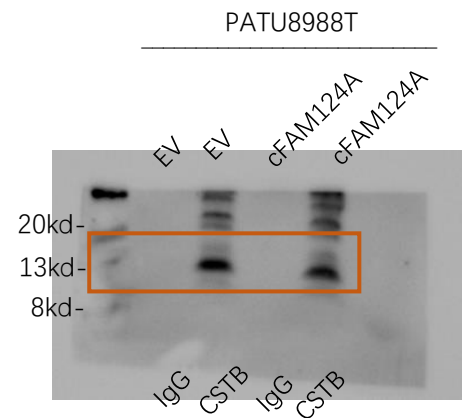

Full unedited gel for Figure 8D CTSL

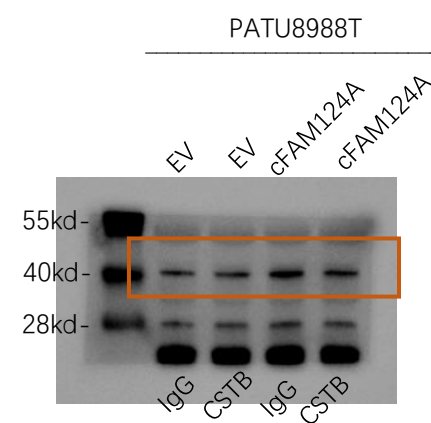

Full unedited gel for Figure 8D CSTB

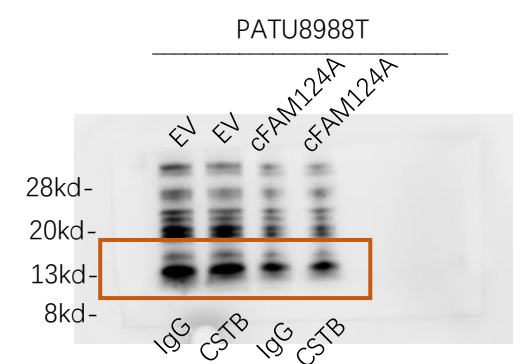

### Full unedited gel for Figure 8E

Full unedited gel for Figure 8E CTSL

Full unedited gel for Figure 8E CSTB

Full unedited gel for Figure 8E CTSL

Full unedited gel for Figure 8D CSTB

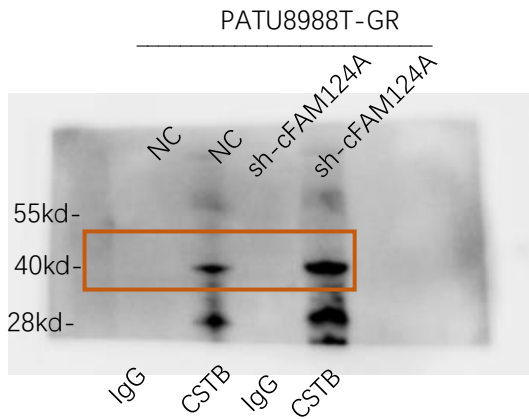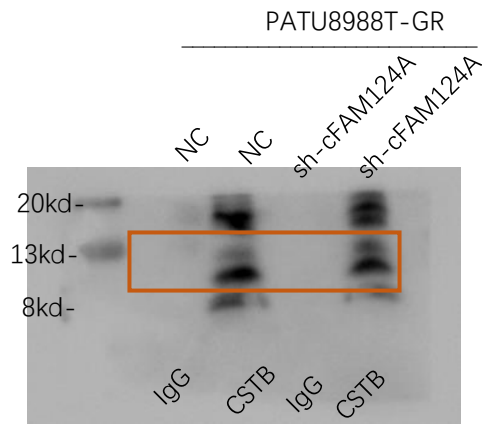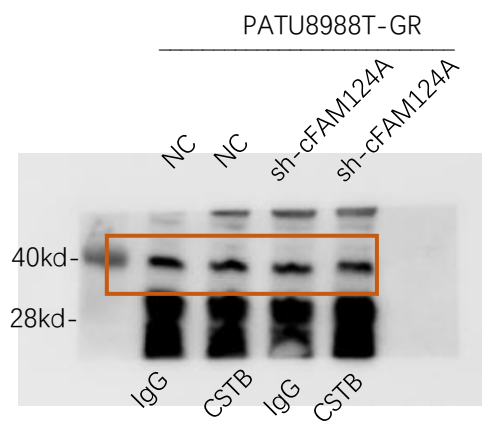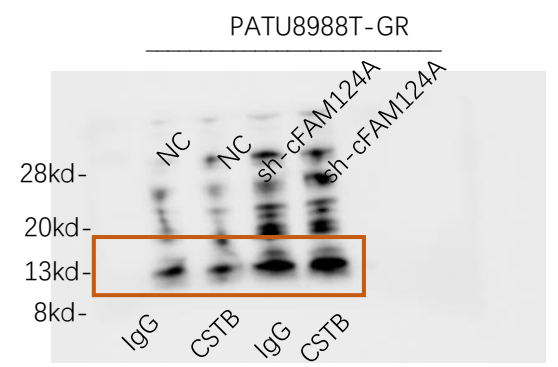

### Full unedited gel for Figure 8G

Full unedited gel for Figure 8G CSTB

Full unedited gel for Figure 8G CSTB

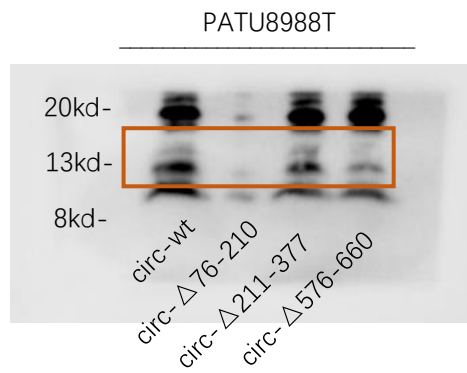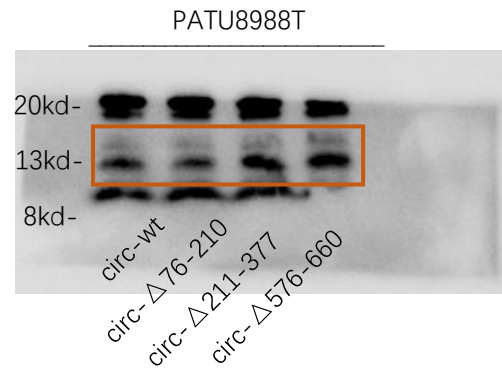

### Full unedited gel for Figure 8H

Full unedited gel for Figure 8H CTSL

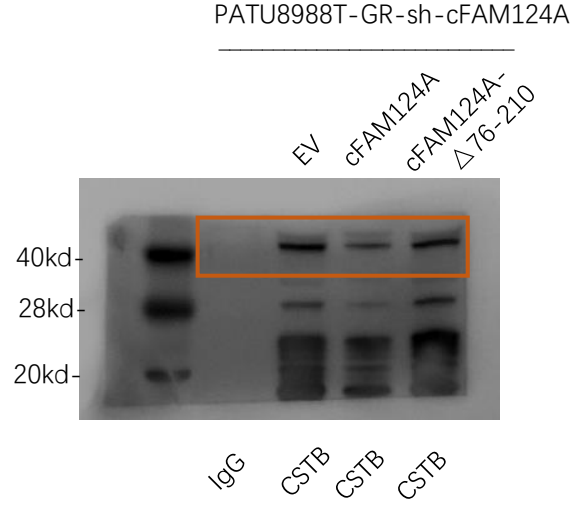

Full unedited gel for Figure 8H CSTB

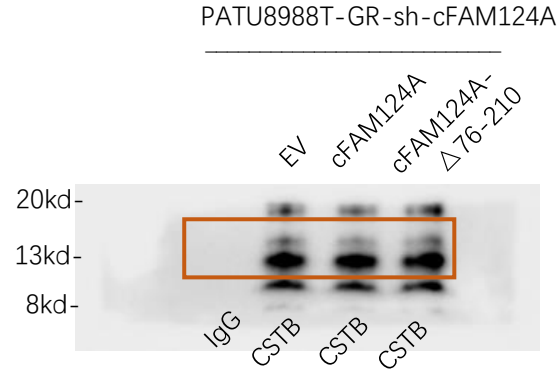

Full unedited gel for Figure 8H CTSL

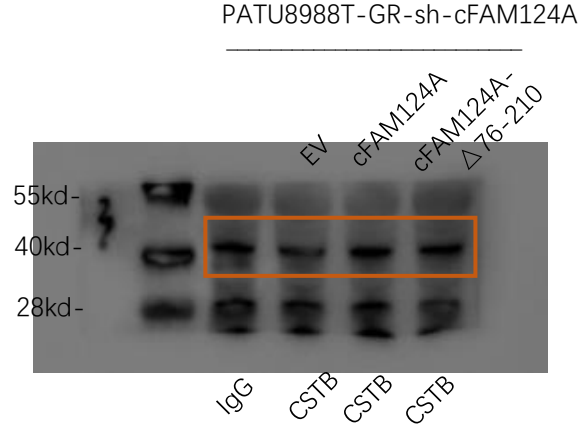

Full unedited gel for Figure 8E CSTB

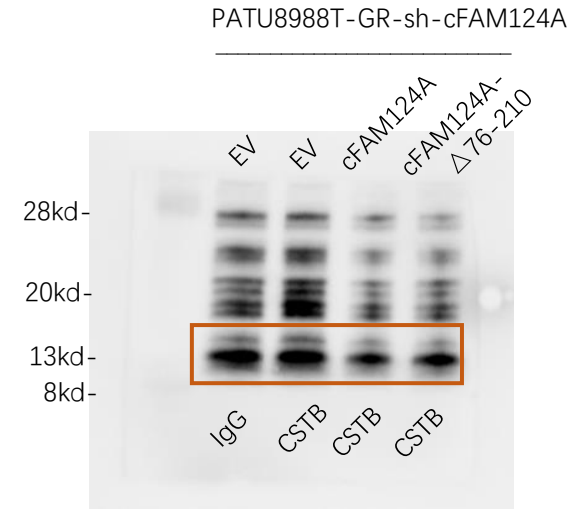

### Full unedited gel for Figure 8I

Full unedited gel for Figure 8I GAPDH

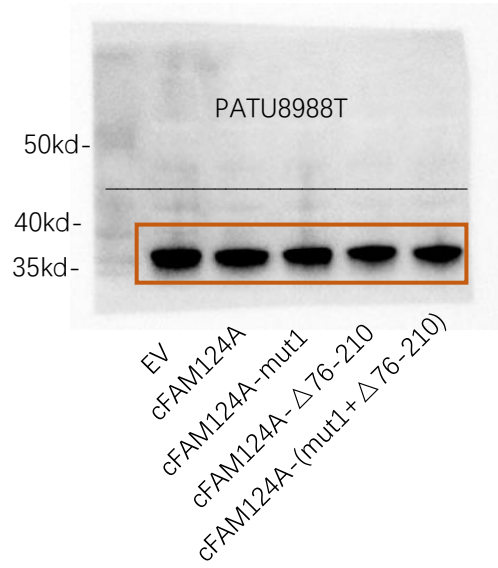

Full unedited gel for Figure 8I Akt

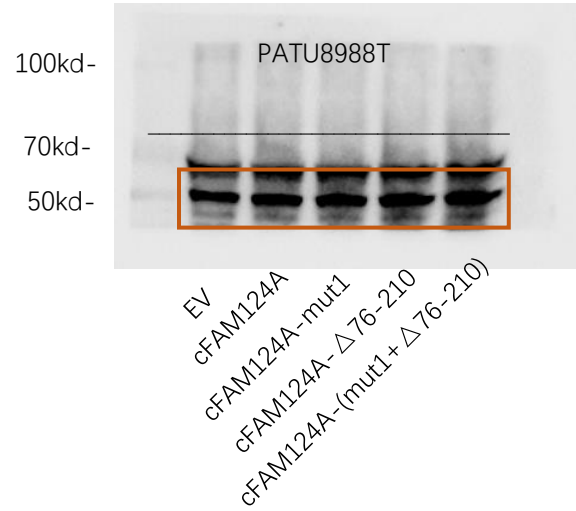

Full unedited gel for Figure 8I p-Akt(Thr308)

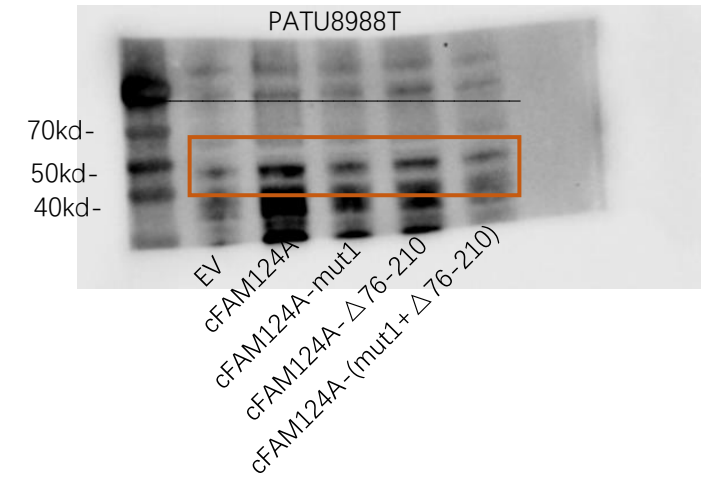

Full unedited gel for Figure 8I p-Akt(ser473)

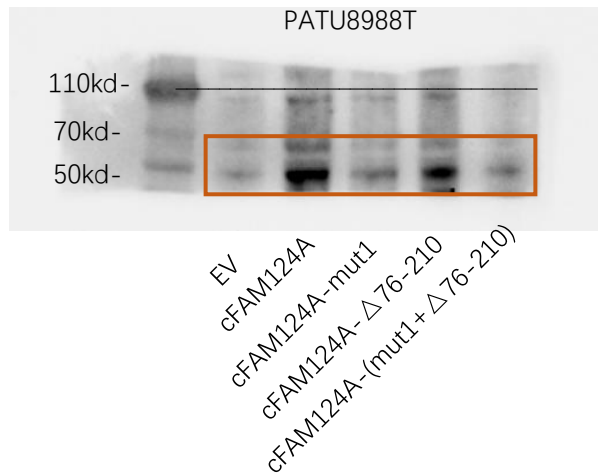

Full unedited gel for Figure 8I CTSL

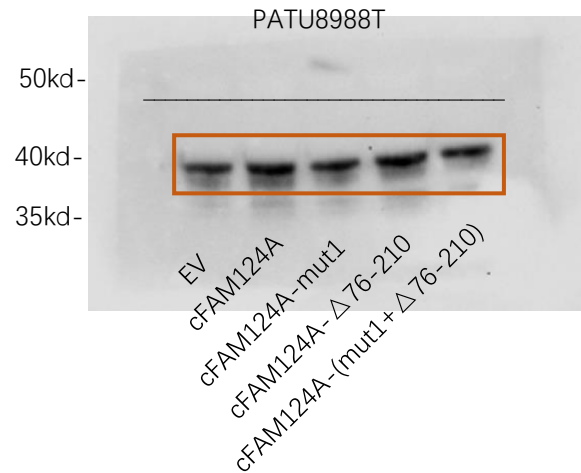

Full unedited gel for Figure 8I RXR $\alpha$ ,tRXR $\alpha$

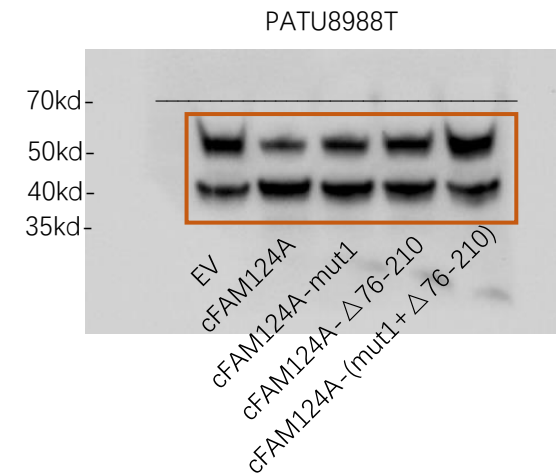

### Full unedited gel for Figure S1 C

Full unedited gel for Figure S1 C GAPDH

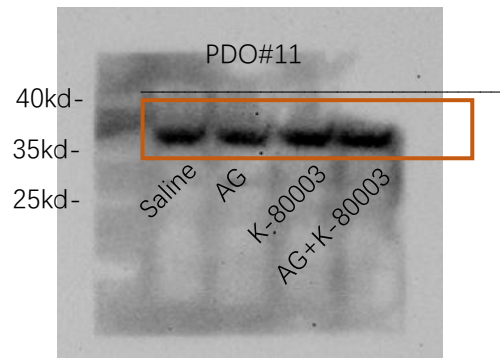

Full unedited gel for Figure S1 C Akt

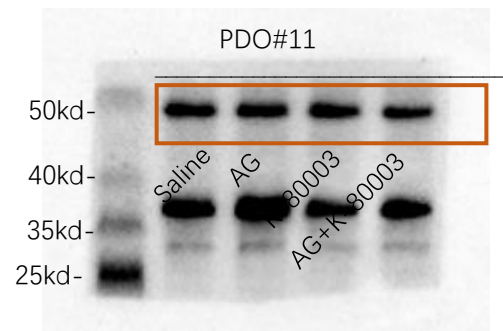

Full unedited gel for Figure S1 C p-Akt(Thr308)

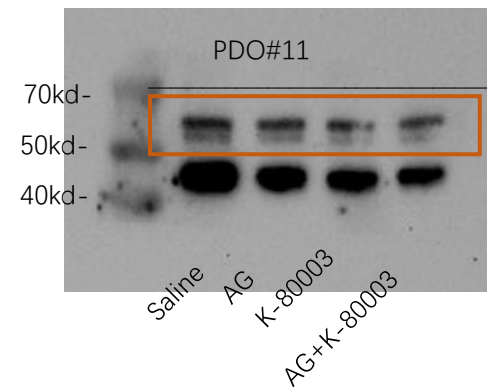

Full unedited gel for Figure S1 C GAPDH

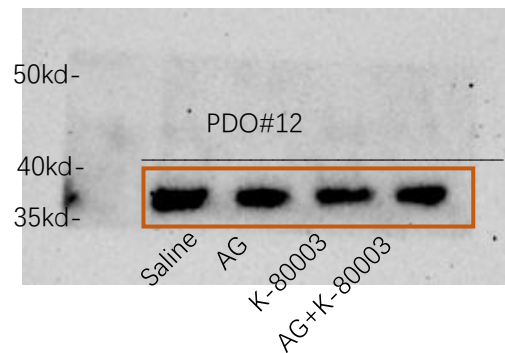

Full unedited gel for Figure S1 C Akt

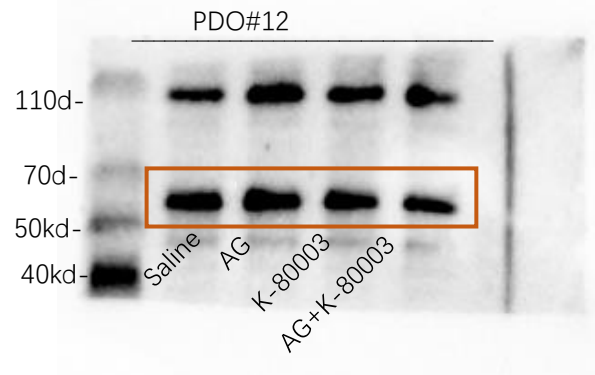

Full unedited gel for Figure S1 C p-Akt(Thr308)

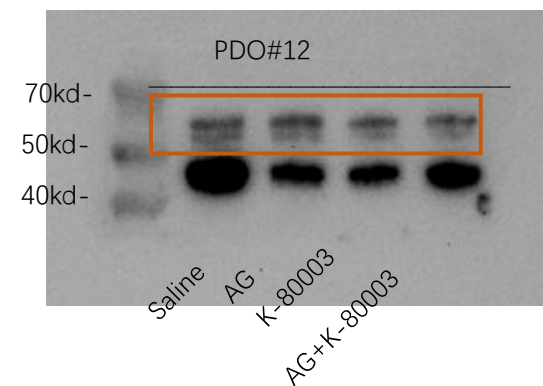

### Full unedited gel for Figure S1 C

Full unedited gel for Figure S1 C GAPDH

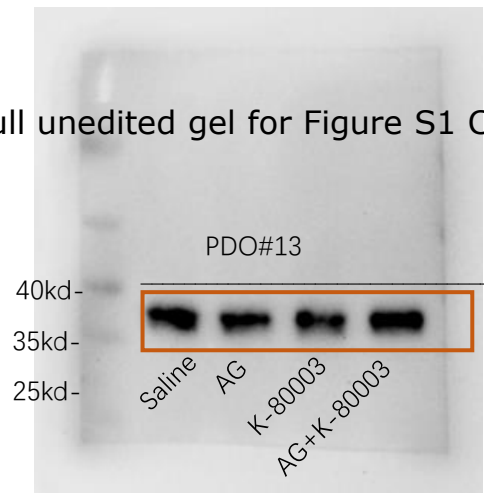

Full unedited gel for Figure S1 C Akt

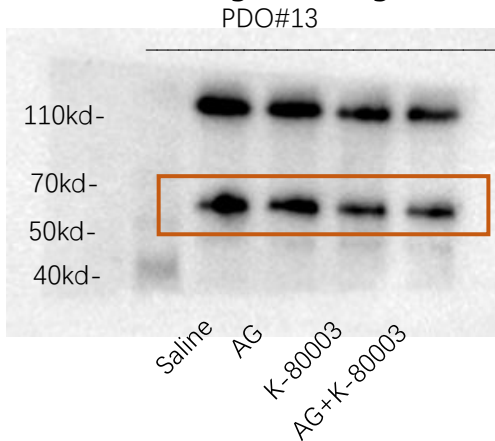

Full unedited gel for Figure S1 C p-Akt(Thr308)

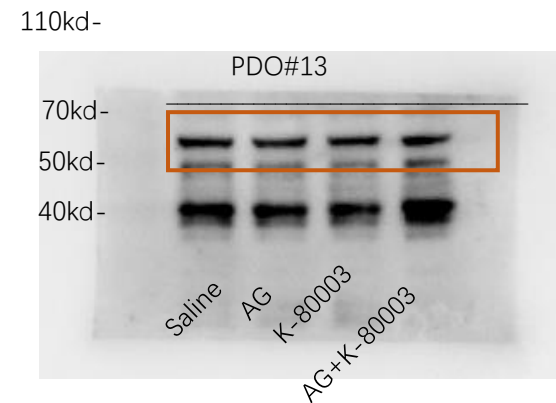

Full unedited gel for Figure S1 C GAPDH

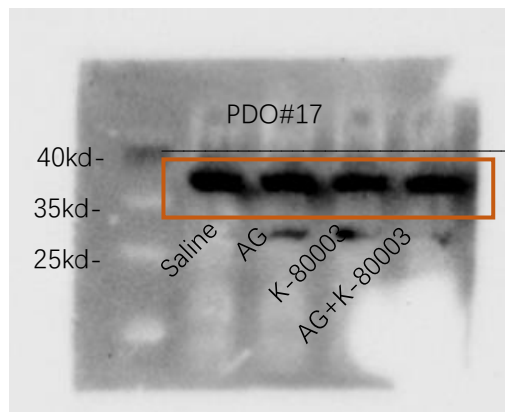

Full unedited gel for Figure S1 C Akt

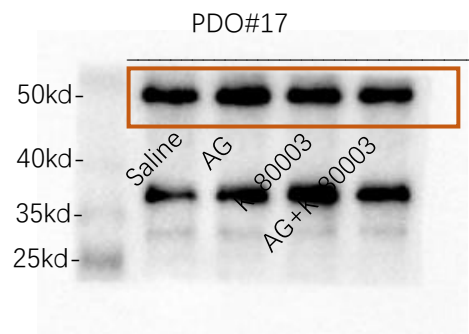

Full unedited gel for Figure S1 C p-Akt(Thr308)

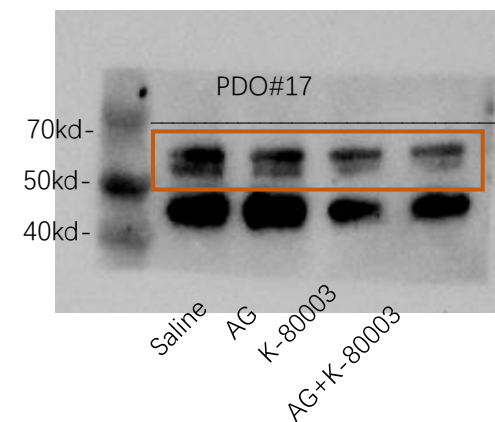



### Full unedited gel for Figure S1 C

Full unedited gel for Figure S1 C GAPDH

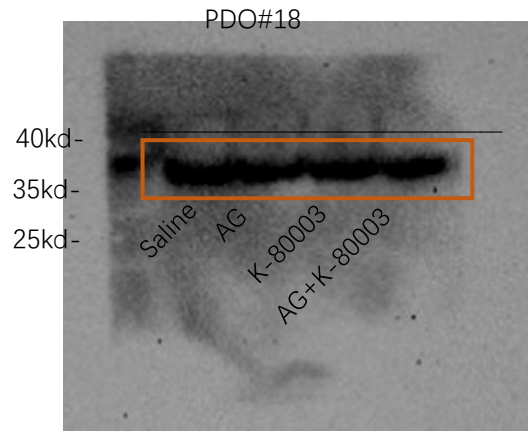

Full unedited gel for Figure S1 C Akt

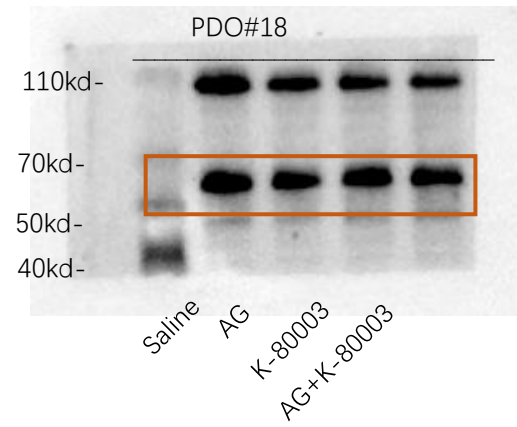

Full unedited gel for Figure S1 C p-Akt(Thr308)

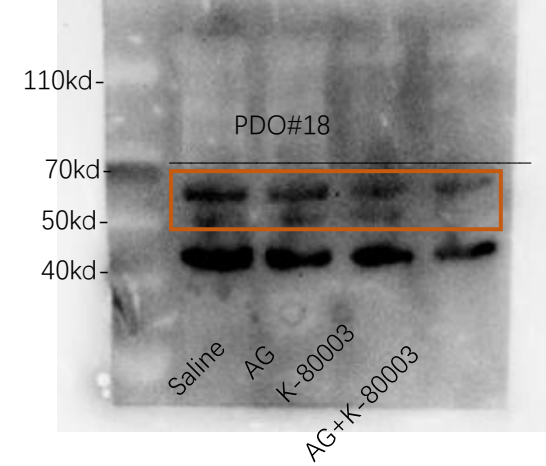

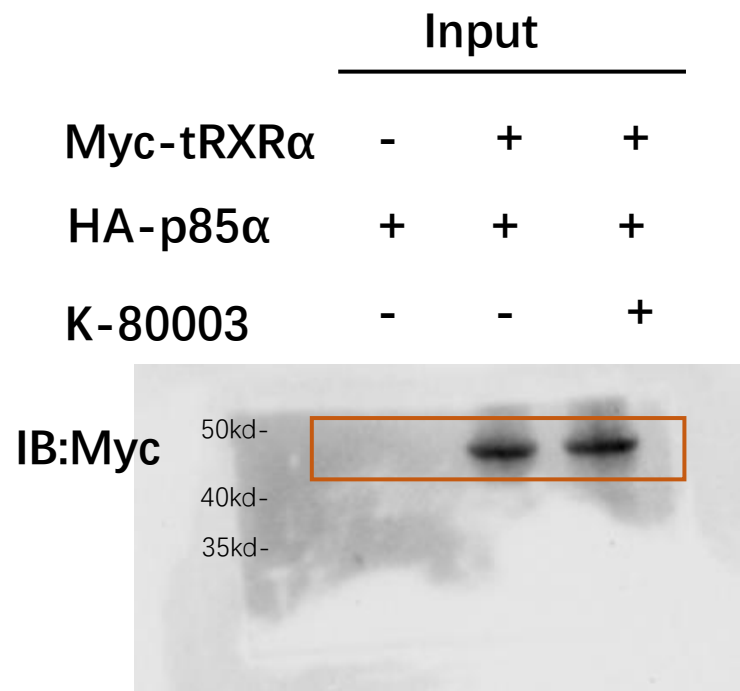

**Full unedited gel for Figure S4A**

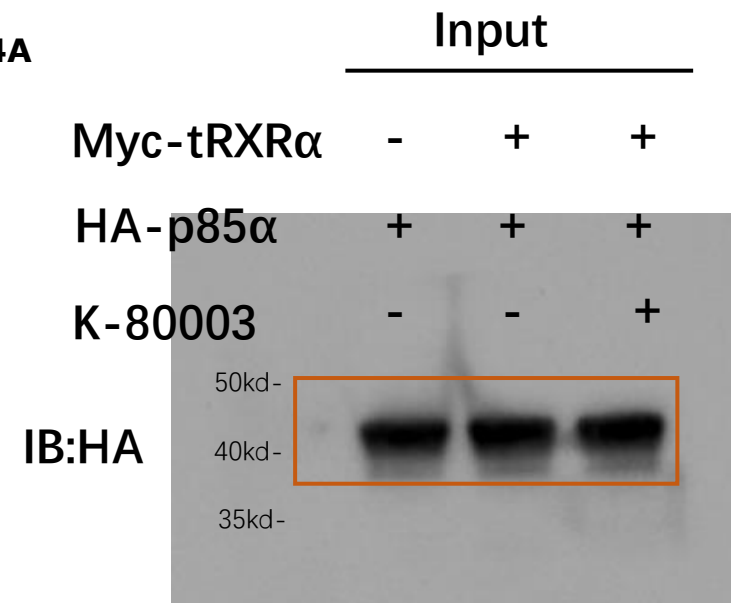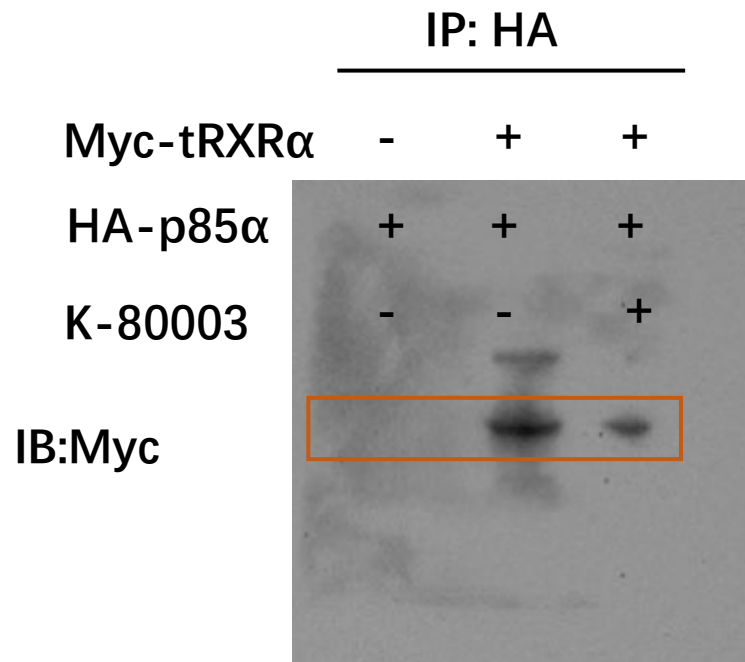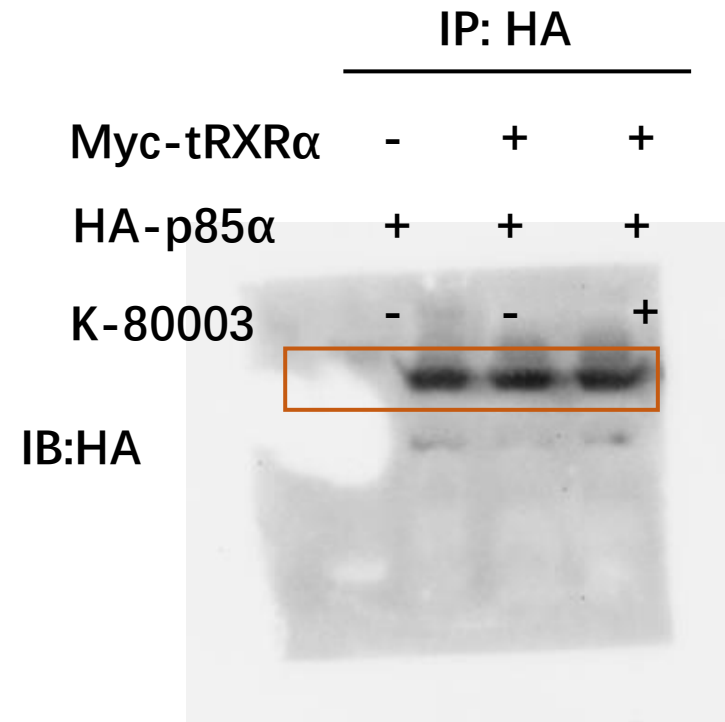

**Full unedited gel for Figure S4 C**

Full unedited gel for Figure S4 C GAPDH

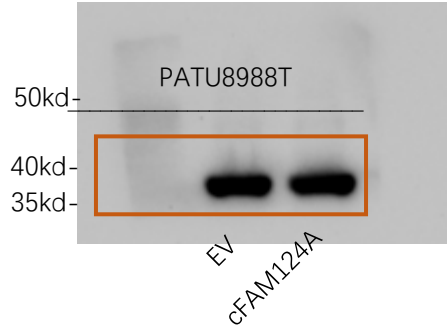

Full unedited gel for Figure S4 C -AKT

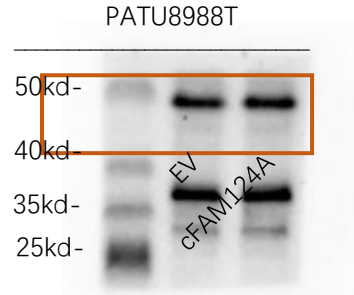

Full unedited gel for Figure S4 C p-Akt(Thr308)

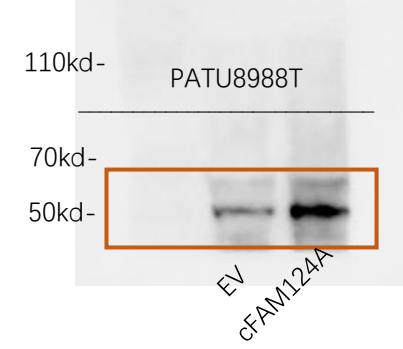

Full unedited gel for Figure S4 C p-Akt(ser473)

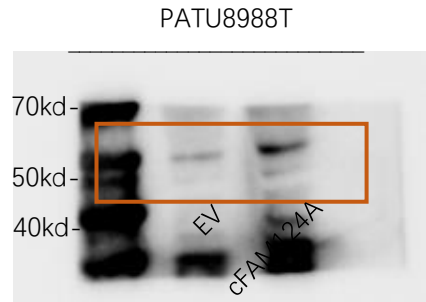

Full unedited gel for Figure S4C RXR $\alpha$ ,tRXR $\alpha$

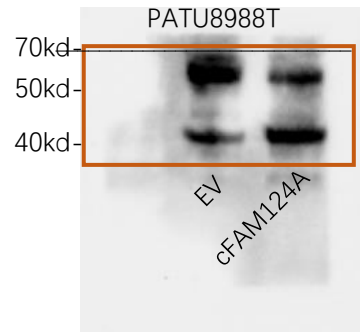

Full unedited gel for Figure S4C GAPDH

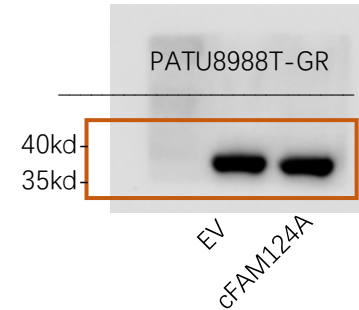

Full unedited gel for Figure S4C RXR $\alpha$ ,tRXR $\alpha$

Full unedited gel for Figure S4C Akt

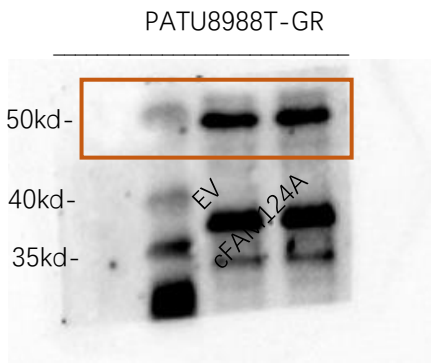

Full unedited gel for Figure S4C p-Akt(Thr308)

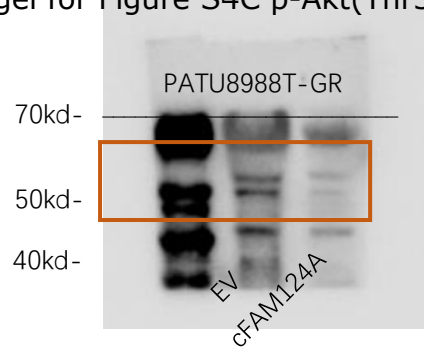

Full unedited gel for Figure S4C p-Akt(ser473)

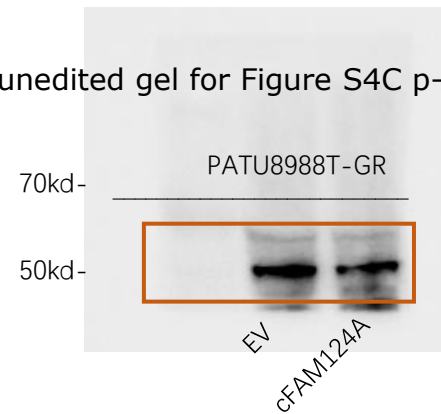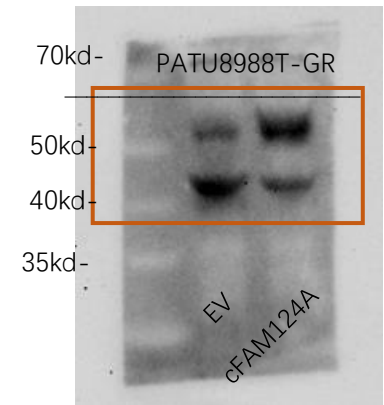

**Full unedited gel for Figure S4 C**

Full unedited gel for Figure S4 C GAPDH

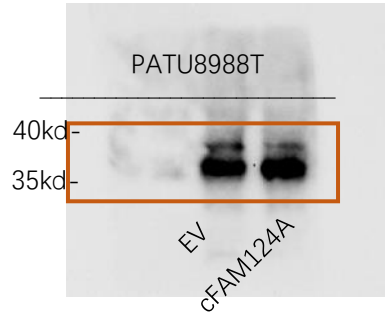

Full unedited gel for Figure S4 C -AKT

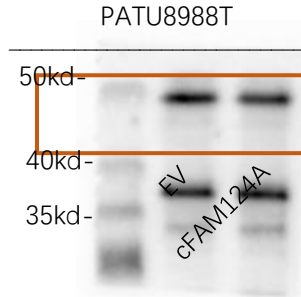

Full unedited gel for Figure S4 C p-Akt(Thr308)

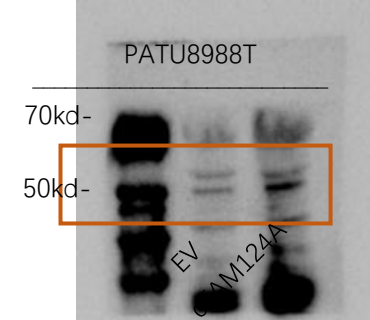

Full unedited gel for Figure S4 C p-Akt(ser473)

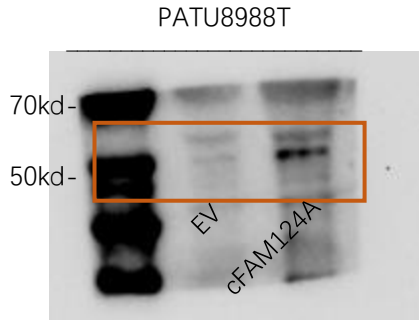

Full unedited gel for Figure S4C RXR $\alpha$ ,tRXR $\alpha$

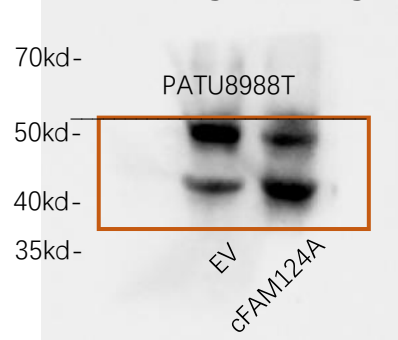

Full unedited gel for Figure S4C GAPDH

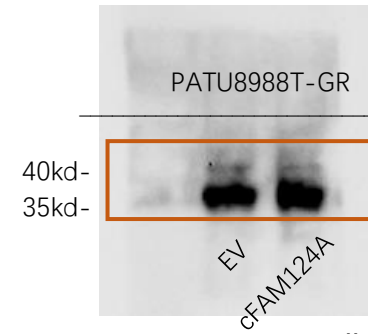

Full unedited gel for Figure S4C RXR $\alpha$ ,tRXR $\alpha$

Full unedited gel for Figure S4C Akt

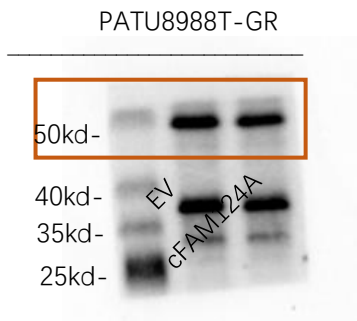

Full unedited gel for Figure S4C p-Akt(Thr308)

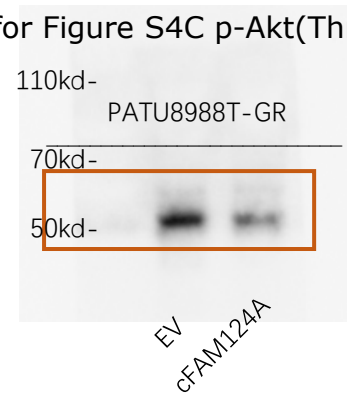

Full unedited gel for Figure S4C p-Akt(ser473)

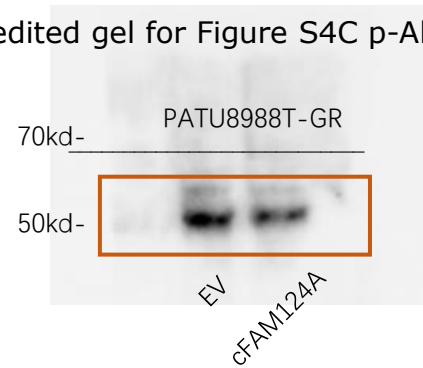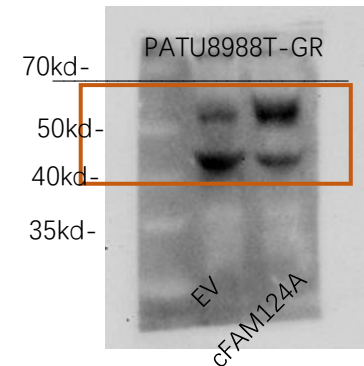

Full unedited gel for Figure S4F

Full unedited gel for Figure S4F GAPDH

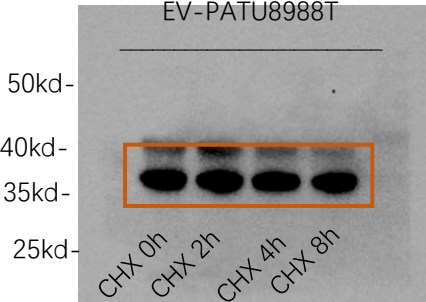

Full unedited gel for Figure S4F GAPDH

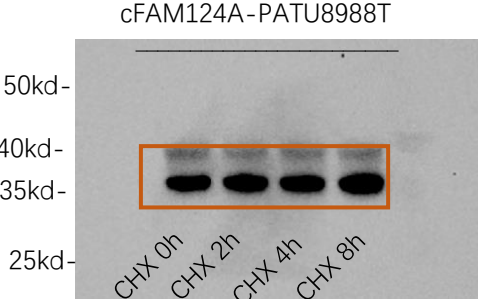

Full unedited gel for Figure S4F RXR $\alpha$ ,tRXR $\alpha$

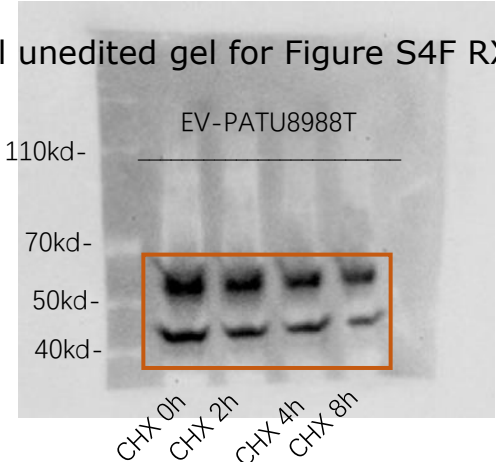

Full unedited gel for Figure S4F RXR $\alpha$ ,tRXR $\alpha$

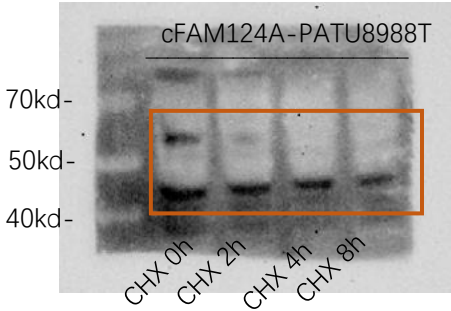

Full unedited gel for Figure S4F

Full unedited gel for Figure S4F GAPDH

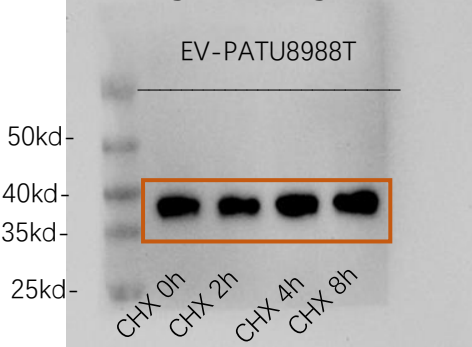

Full unedited gel for Figure S4F GAPDH

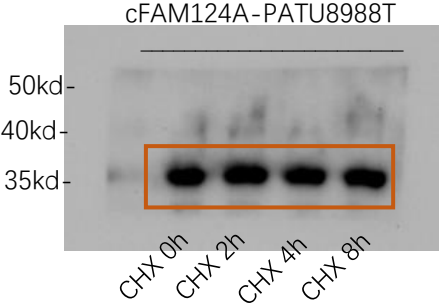

Full unedited gel for Figure S4F RXR $\alpha$ ,tRXR $\alpha$

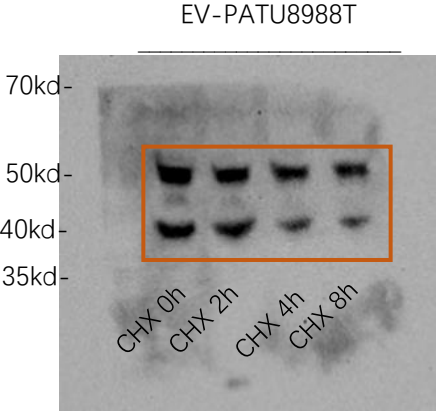

Full unedited gel for Figure S4F RXR $\alpha$ ,tRXR $\alpha$

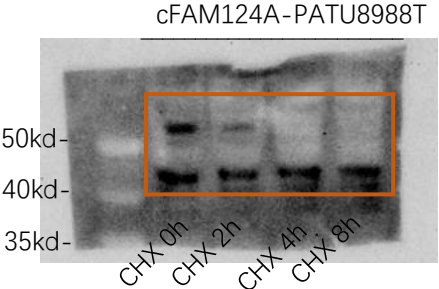

**Full unedited gel for Figure S4G**

Full unedited gel for Figure S4G GAPDH

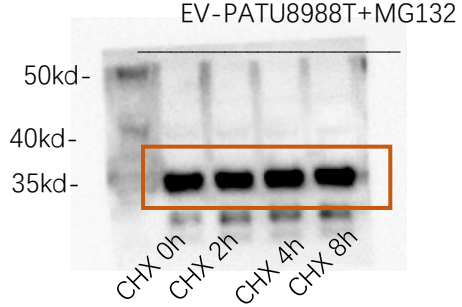

Full unedited gel for Figure S4G GAPDH

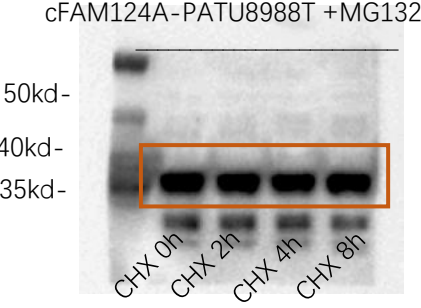

Full unedited gel for Figure S4G RXR $\alpha$ ,tRXR $\alpha$

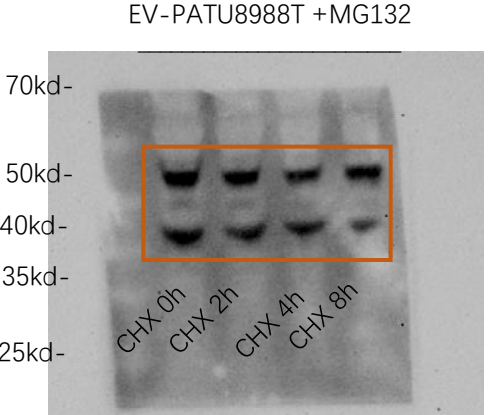

Full unedited gel for Figure S4G RXR $\alpha$ ,tRXR $\alpha$

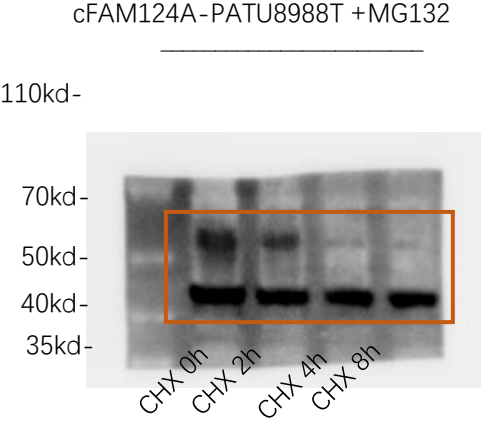

**Full unedited gel for Figure S4G**

Full unedited gel for Figure S4G GAPDH

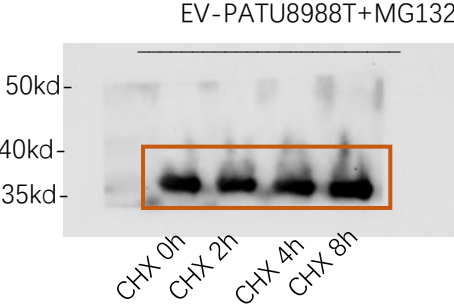

Full unedited gel for Figure S4G GAPDH

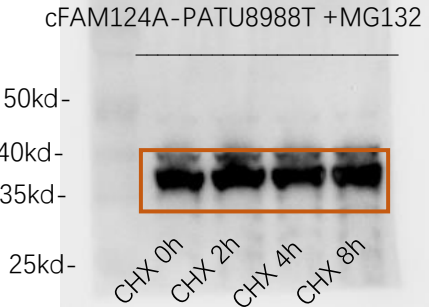

Full unedited gel for Figure S4G RXR $\alpha$ ,tRXR $\alpha$

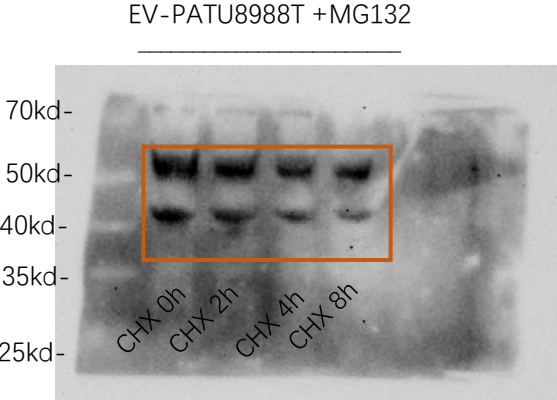

Full unedited gel for Figure S4G RXR $\alpha$ ,tRXR $\alpha$

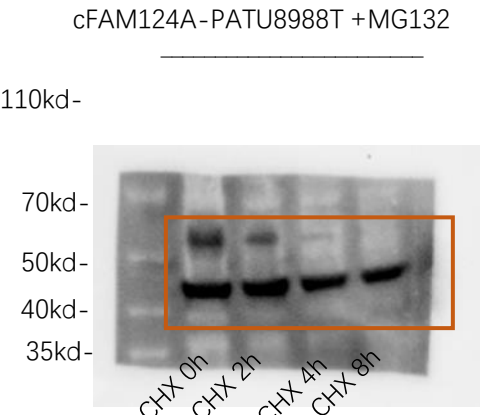



Full unedited gel for Figure S5A

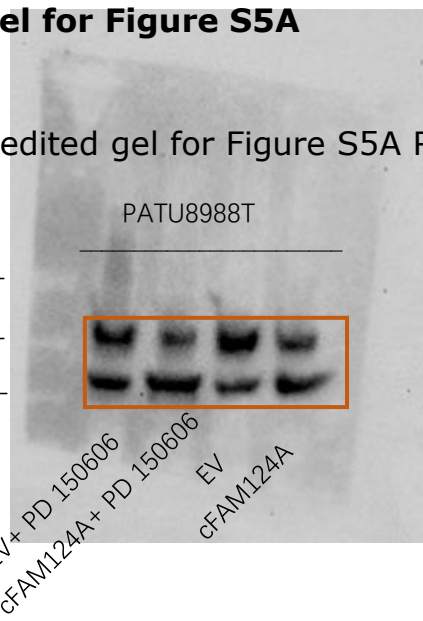

Full unedited gel for Figure S5A RXR $\alpha$ ,tRXR $\alpha$

Full unedited gel for Figure S5A GAPDH

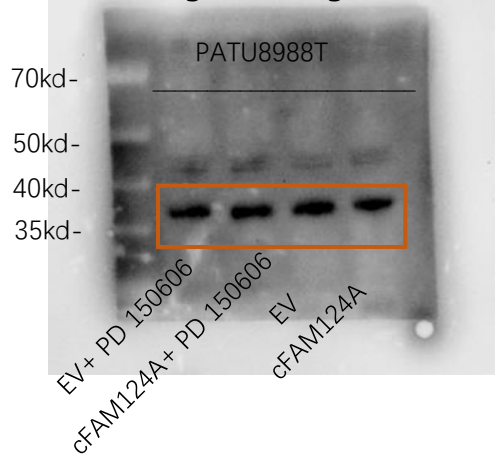

Full unedited gel for Figure S5A RXR $\alpha$ ,tRXR $\alpha$

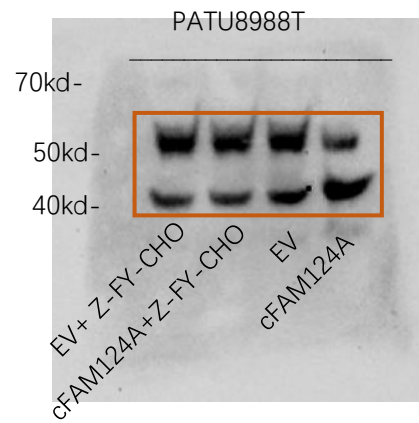

Full unedited gel for Figure S5A GAPDH

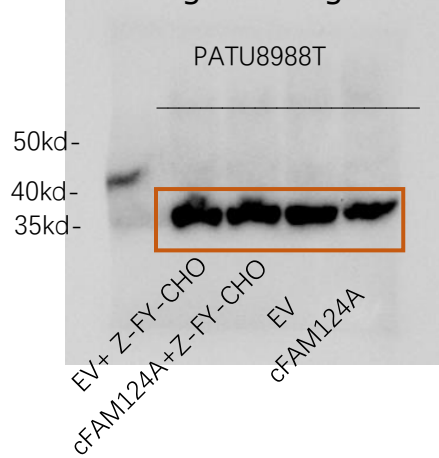

Full unedited gel for Figure S5A

Full unedited gel for Figure S5A GAPDH

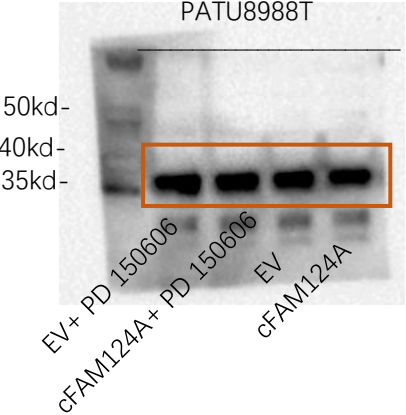

Full unedited gel for Figure S5A RXR $\alpha$ ,tRXR $\alpha$

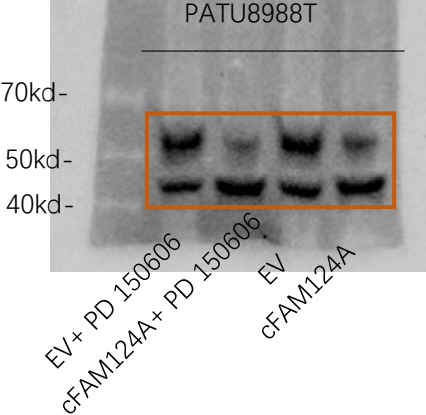

Full unedited gel for Figure S5A GAPDH

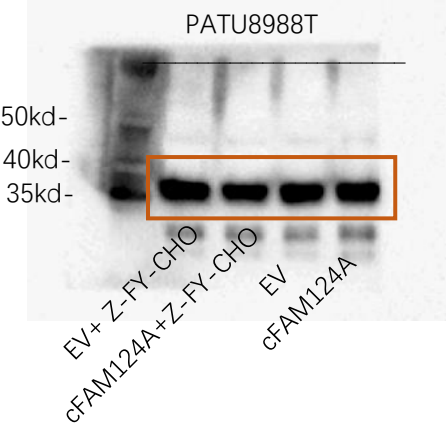

Full unedited gel for Figure S5A RXR $\alpha$ ,tRXR $\alpha$

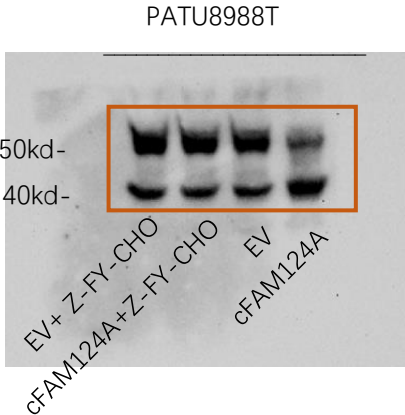

**Full unedited gel for Figure S5B**

Full unedited gel for Figure S5B GAPDH

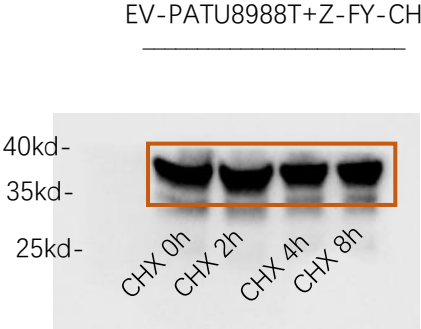

Full unedited gel for Figure S5B GAPDH

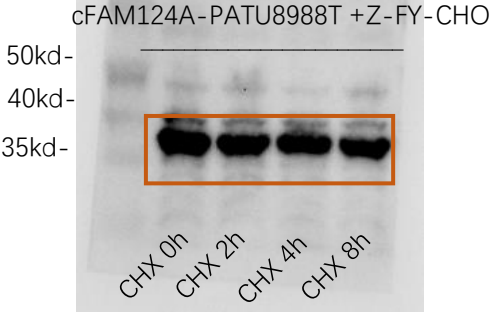

Full unedited gel for Figure S5B RXR $\alpha$ ,tRXR $\alpha$

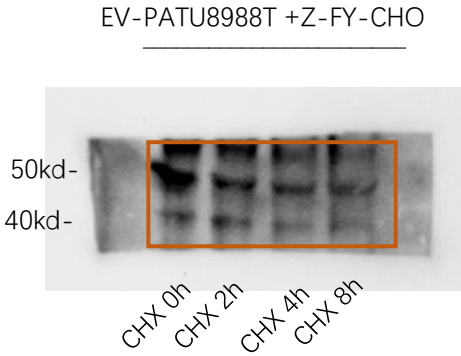

Full unedited gel for Figure S5B RXR $\alpha$ ,tRXR $\alpha$

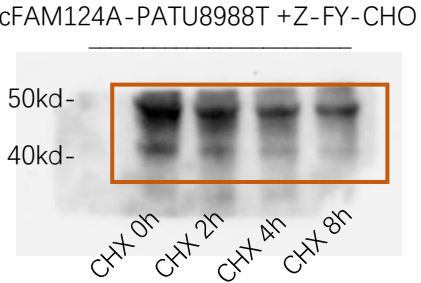

**Full unedited gel for Figure S5B**

Full unedited gel for Figure S5B GAPDH

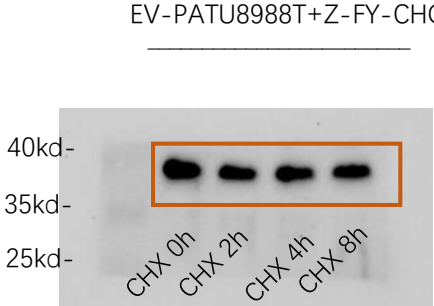

Full unedited gel for Figure S5B GAPDH

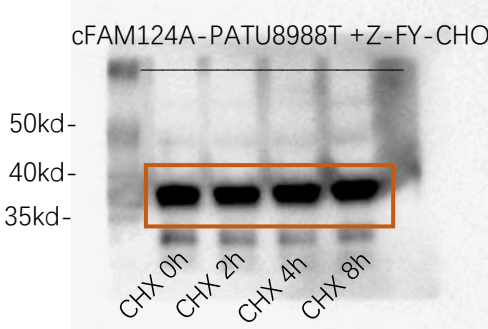

Full unedited gel for Figure S5B RXR $\alpha$ ,tRXR $\alpha$

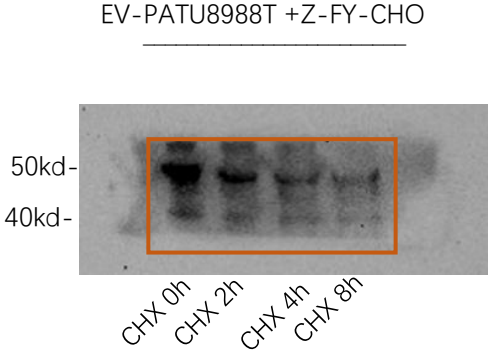

Full unedited gel for Figure S5B RXR $\alpha$ ,tRXR $\alpha$

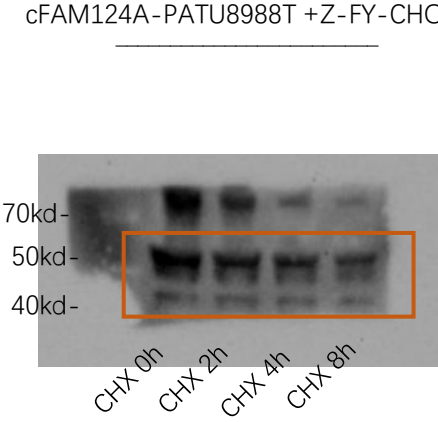

### Full unedited gel for Figure S5C

Full unedited gel for Figure S5C GAPDH

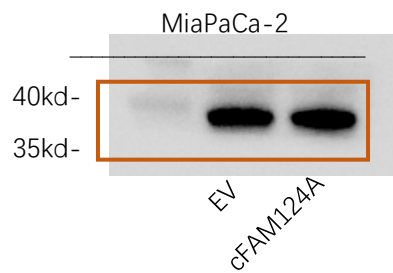

Full unedited gel for Figure S5C CTSL

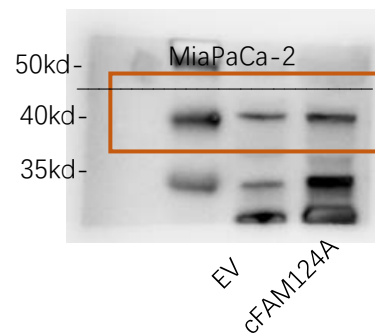

Full unedited gel for Figure S5C GAPDH

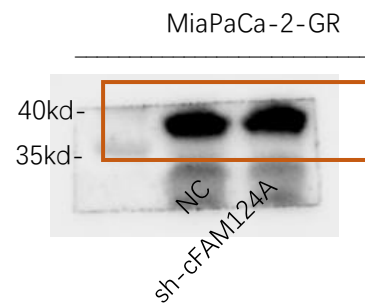

Full unedited gel for Figure S5C CTSL

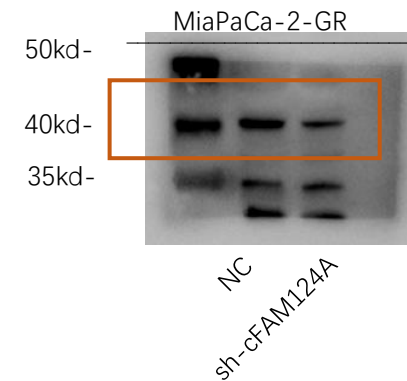

Full unedited gel for Figure S5C GAPDH

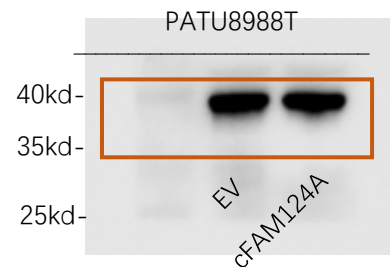

Full unedited gel for Figure S5C CTSL

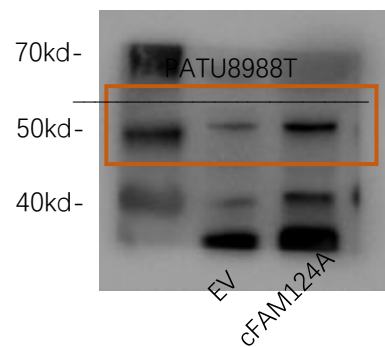

Full unedited gel for Figure S5C GAPDH

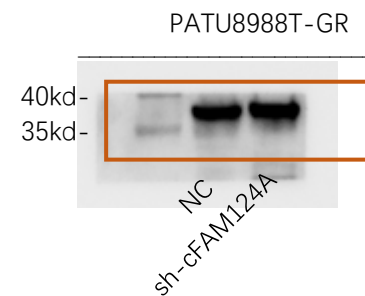

Full unedited gel for Figure S5C CTSL

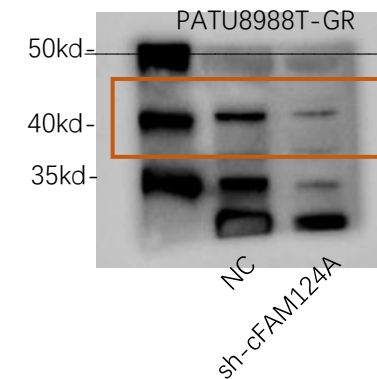

## Full unedited gel for Figure S5 E

Full unedited gel for Figure S5E AGO2

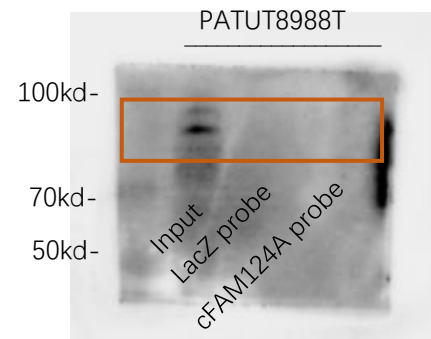

### Full unedited gel for Figure S5H

Full unedited gel for Figure S5H GAPDH

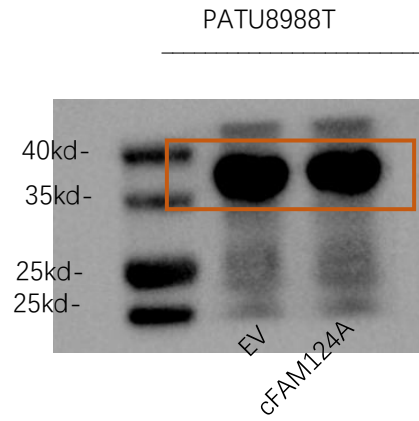

Full unedited gel for Figure S5H IGF2BP2

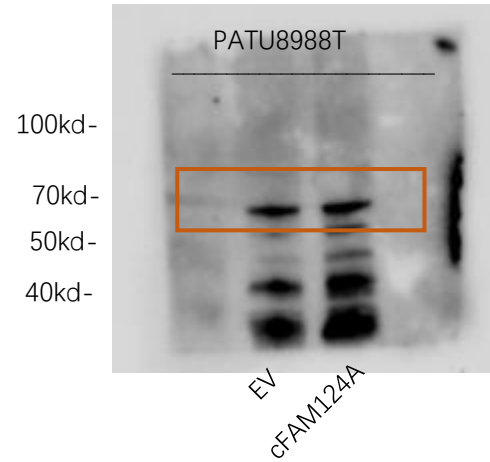

Full unedited gel for Figure S5H GAPDH

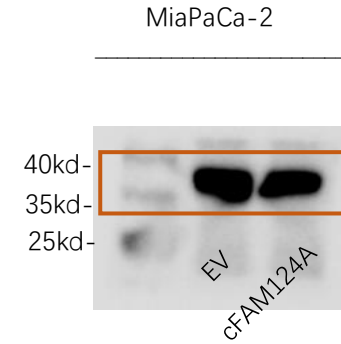

Full unedited gel for Figure S5H CTSL

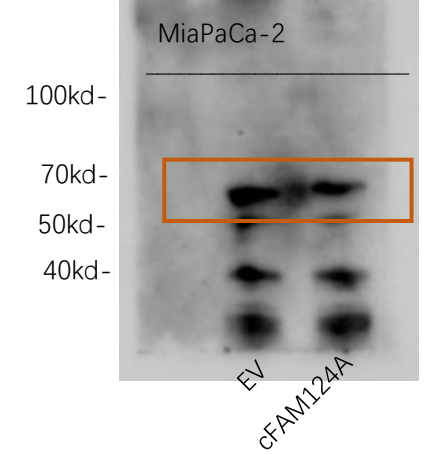

### Full unedited gel for Figure S5K

Full unedited gel for Figure S5K GAPDH

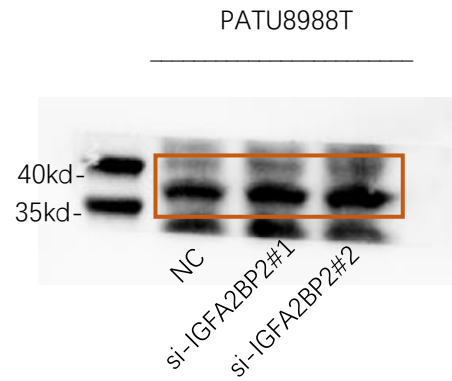

Full unedited gel for Figure S5K IGF2BP2

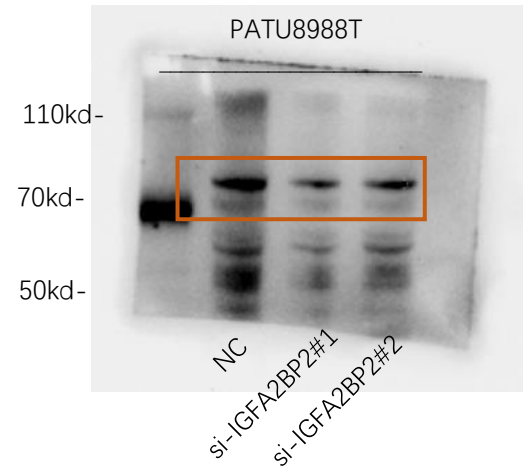

Full unedited gel for Figure S5M GAPDH

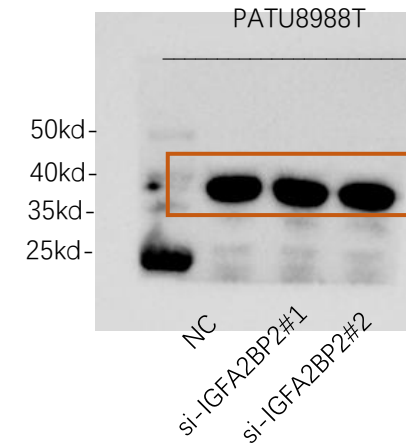

Full unedited gel for Figure S5M CTSL

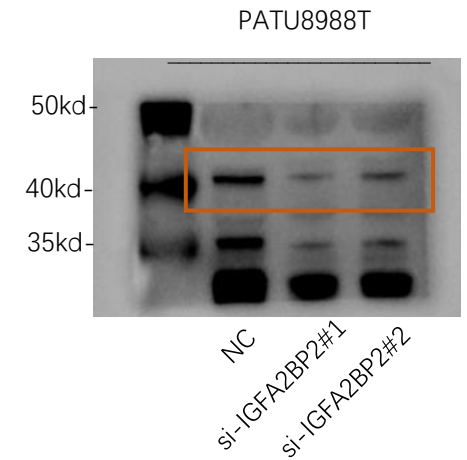

### Full unedited gel for Figure S6A

Full unedited gel for Figure S6A GAPDH Full unedited gel for Figure S6A CSTA Full unedited gel for Figure S6A GAPDH Full unedited gel for Figure S6A CSTB

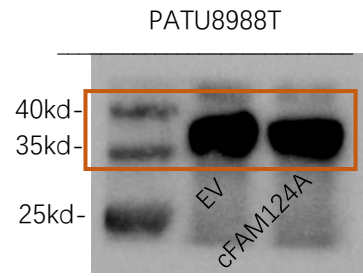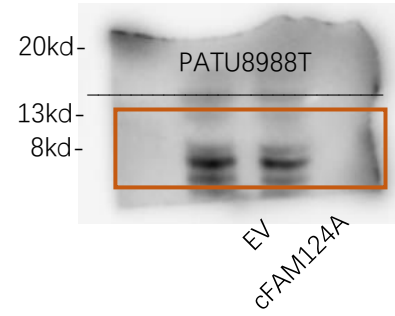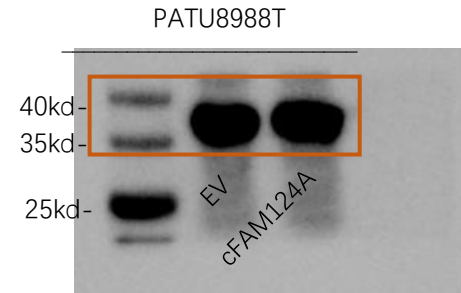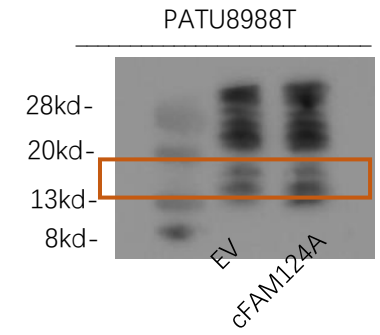



**Full unedited gel for Figure S6C**

Full unedited gel for Figure S6C GAPDH

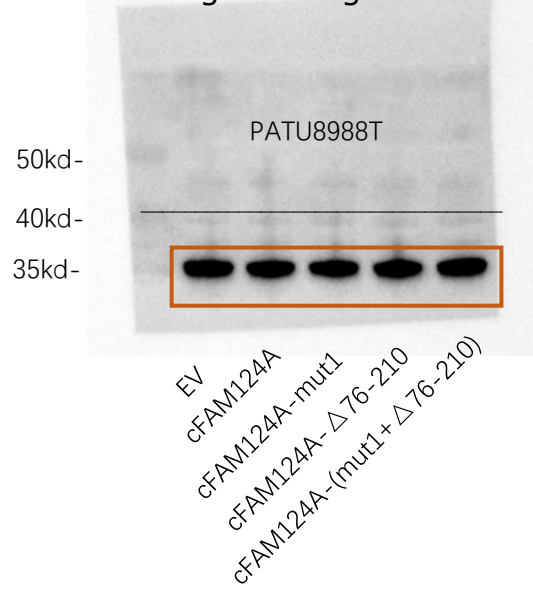

Full unedited gel for Figure S6C Akt

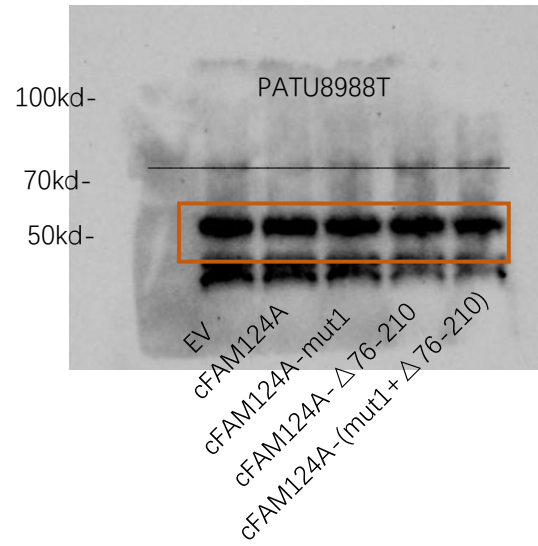

Full unedited gel for Figure S6C p-Akt(Thr308)

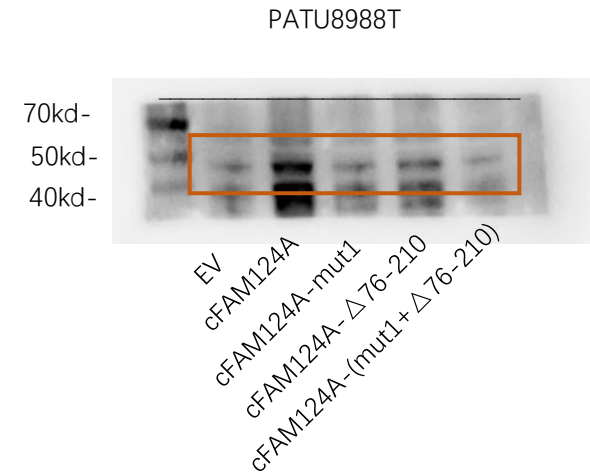

Full unedited gel for Figure S6C p-Akt(ser473)

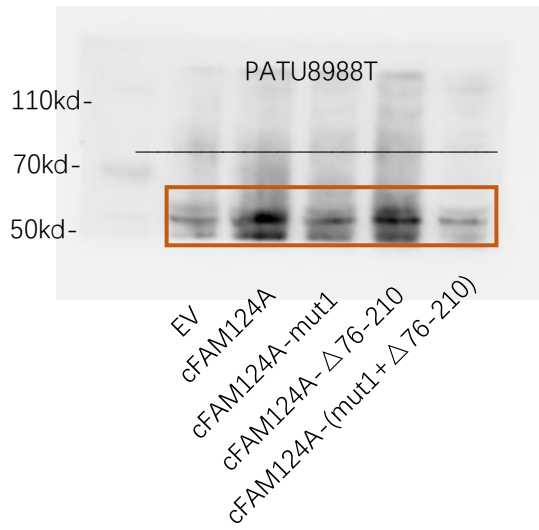

Full unedited gel for Figure S6C CTSL

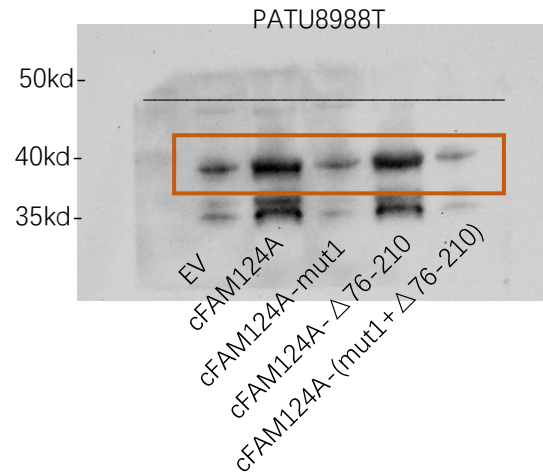

Full unedited gel for Figure S6C RXRα,tRXRα

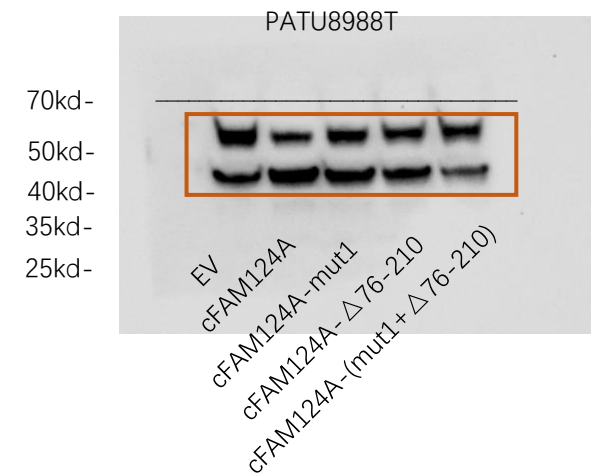

**Full unedited gel for Figure S6C**

Full unedited gel for Figure S6C GAPDH

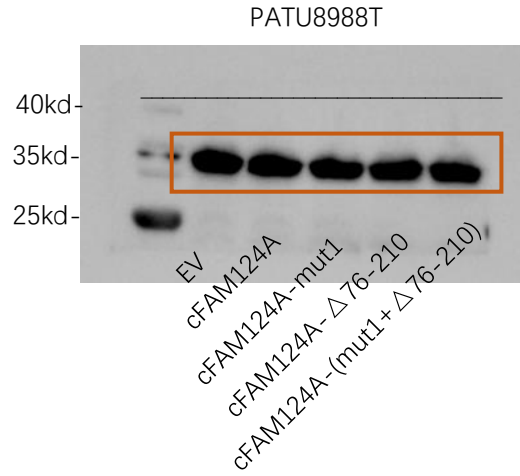

Full unedited gel for Figure S6C Akt

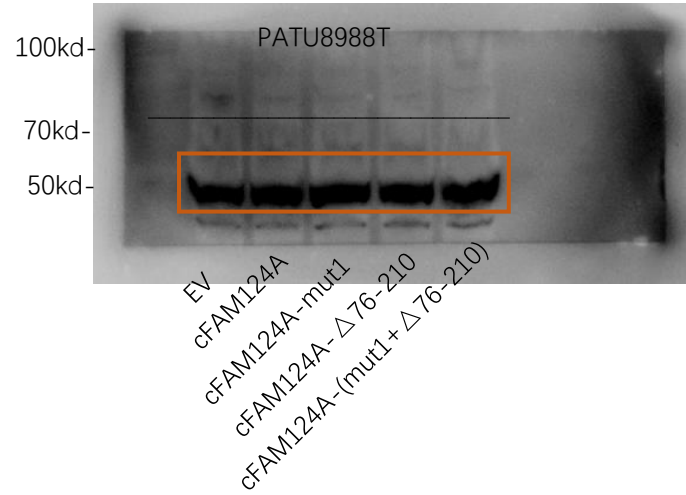

Full unedited gel for Figure S6C p-Akt(Thr308)

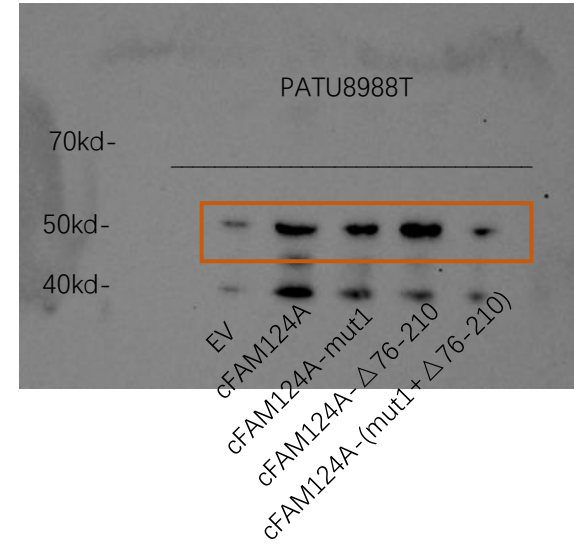

Full unedited gel for Figure S6C p-Akt(ser473)

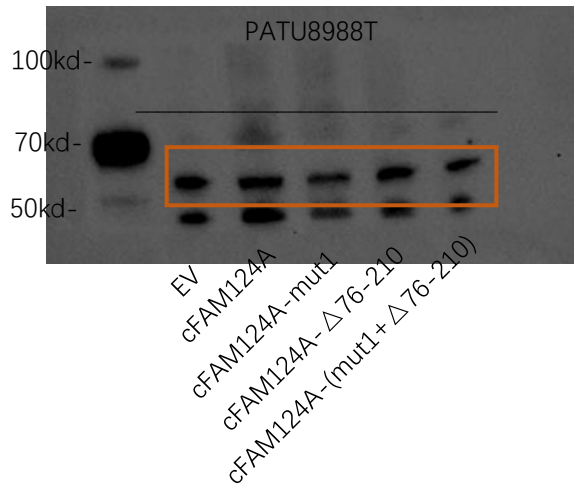

Full unedited gel for Figure S6C CTSL

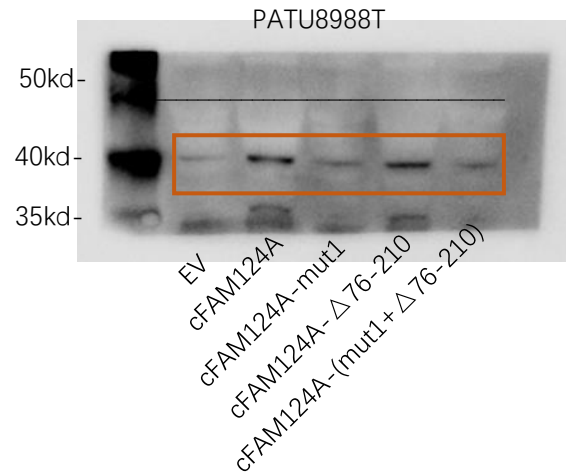

Full unedited gel for Figure S6C RXRα,tRXRα

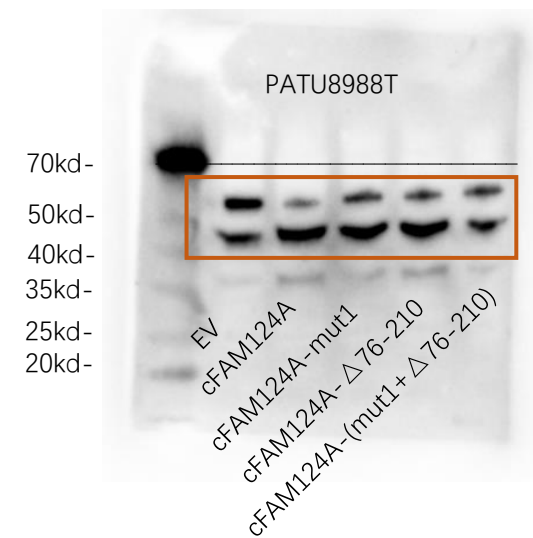

**Full unedited gel for Figure S2 F-G**

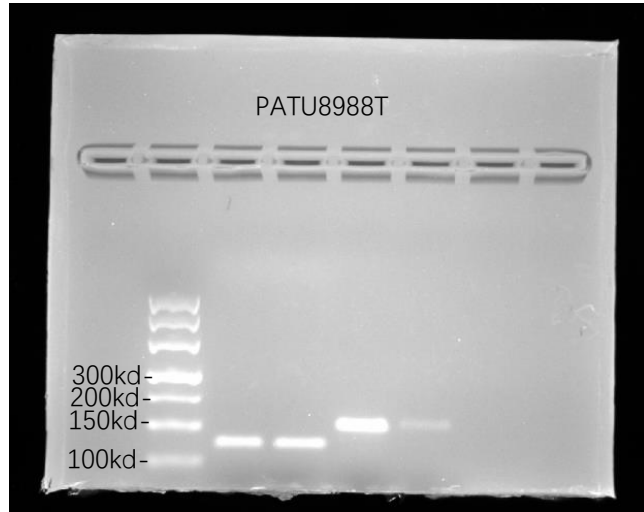

cFAM124A  
cFAM124A + RNase R  
FAM124A  
FAM124A + RNase R

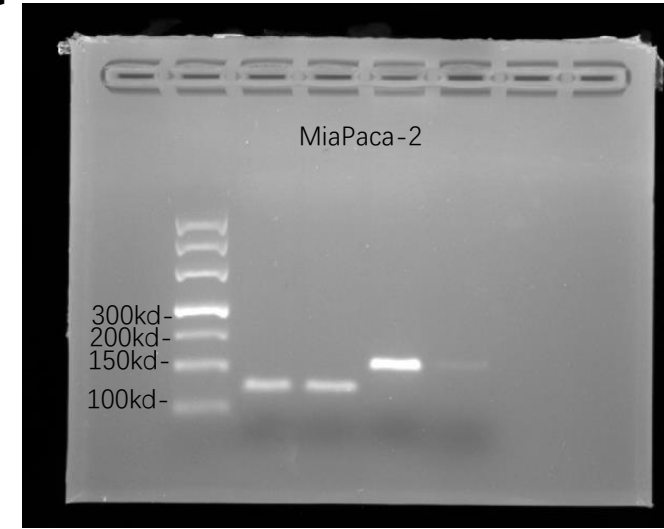

cFAM124A  
cFAM124A + RNase R  
FAM124A  
FAM124A + RNase R

**Full unedited gel for Figure S2 H**

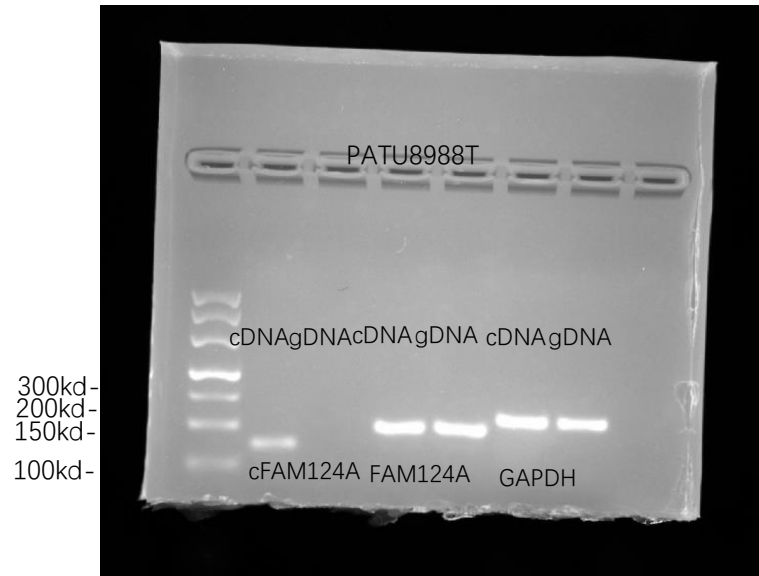

cDNA gDNA cDNA gDNA cDNA gDNA  
cFAM124A FAM124A GAPDH

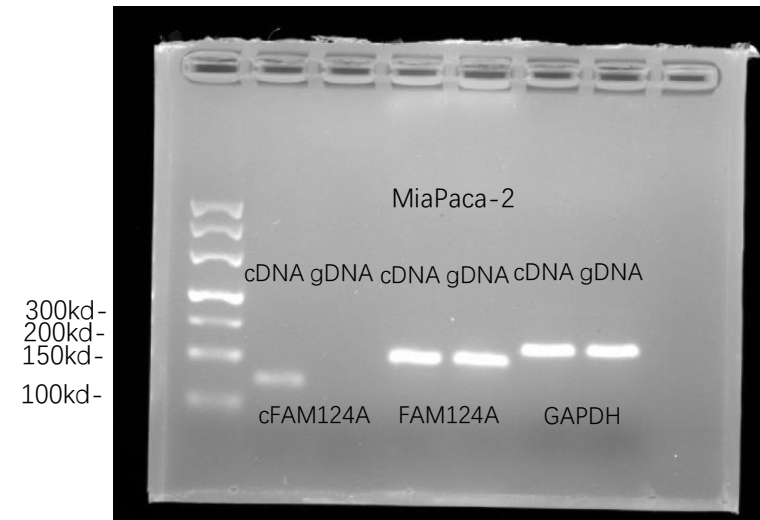

cDNA gDNA cDNA gDNA cDNA gDNA  
cFAM124A FAM124A GAPDH
